# Supplementary material for: Maximizing the ionic liquid content and specific surface area in hierarchically nanoporous hypercrosslinked poly(ionic liquid)s towards the efficient conversion of CO2 into cyclic carbonates
Source: Royal Society of Chemistry journal article supplement (doi:10.1039/d3gc00009e), 2023-01-01
Supplement: d3gc00009e1.pdf [file d3gc00009e1.pdf]

## Supporting Information

### Maximizing ionic liquid content and specific surface area in hierarchically nanoporous hypercrosslinked poly(ionic liquid)s towards efficient conversion of CO<sub>2</sub> into cyclic carbonates

Hongbing Lyu,<sup>a</sup> Xiaochen Wang,<sup>\*a</sup> Wanting Sun,<sup>a</sup> Ergang Xu,<sup>a</sup> Yaping She,<sup>a</sup> Anqiu Liu,<sup>\*a</sup> Daming Gao,<sup>a</sup> Miao Hu,<sup>a</sup> Jianhua Guo,<sup>a</sup> Kunhong Hu,<sup>a</sup> Jihai Cheng,<sup>a</sup> Zhouyang Long,<sup>b</sup> Yangqing Liu<sup>c</sup> and Pengjie Zhang<sup>d</sup>

<sup>a</sup> School of Energy Materials and Chemical Engineering, Hefei University, Hefei 230601, China

<sup>b</sup> School of Chemistry and Materials Science, Jiangsu Key Laboratory of Green Synthetic Chemistry for Functional Materials, Jiangsu Normal University, Xuzhou 221116, China

<sup>c</sup> School of Chemistry and Chemical Engineering, Yancheng Institute of Technology, Yancheng 224000, China

<sup>d</sup> BGRIMM Technology Group Co, Ltd, Beijing 102600, China

#### Corresponding Authors

\* Tel: +86-551-62158395

E-mail: wxc@hfuu.edu.cn (X. Wang); liuaq@hfuu.edu.cn (A. Liu)

## Synthesis and characterization of imidazolium-based ionic liquid monomers

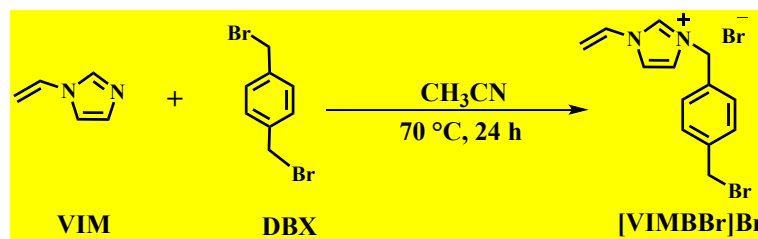

[VIMBBr]Br: <sup>1</sup>H NMR (400 MHz, D<sub>2</sub>O) (Figure S1A):  $\delta$ =8.94 (s, 1H), 7.68 (t, 1H), 7.47 (t, 1H), 7.40 (m, 4H), 5.71 (q, 2H), 5.38 (t, 3H), 4.56 (s, 2H). <sup>13</sup>C NMR (100 MHz, D<sub>2</sub>O) (Figure S1B):  $\delta$ =141.4, 134.5, 132.4, 129.0, 128.1, 122.8, 119.7, 109.5, 63.3, 52.9.

**Scheme S1.** Synthesis of the benzylbromide-tethered IL [VIMBBr]Br.

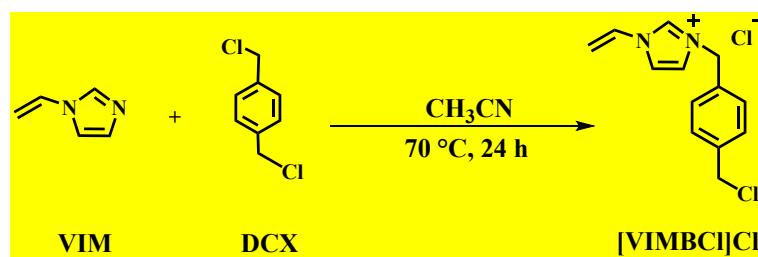

[VIMBCl]Cl: <sup>1</sup>H NMR (400 MHz, D<sub>2</sub>O) (Figure S2A):  $\delta$ =8.93 (d, 1H), 7.65 (d, 1H), 7.43 (d, 1H), 7.32 (d, 4H), 5.68 (q, 2H), 5.31 (q, 3H), 4.57 (t, 2H). <sup>13</sup>C NMR (100 MHz, D<sub>2</sub>O) (Figure S2B):  $\delta$ =139.1, 134.5, 133.3, 129.6, 129.2, 128.1, 122.8, 119.8, 109.6, 52.7, 45.5.

**Scheme S2.** Synthesis of the benzylchloride-tethered IL [VIMBCl]Cl.

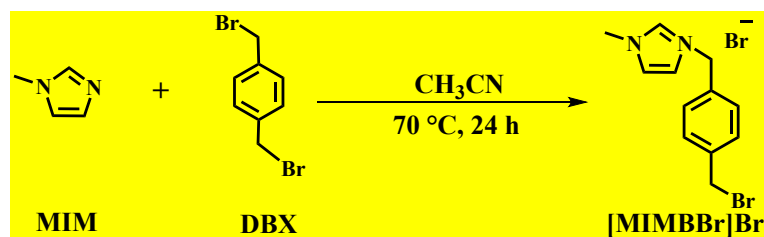

[MIMBBr]Br: <sup>1</sup>H NMR (400 MHz, D<sub>2</sub>O) (Figure S3A):  $\delta$ =8.59 (s, 1H), 7.42 (d, 2H), 7.33 (m, 4H), 5.28 (t, 2H), 4.52 (t, 2H), 3.74 (s, 2H). <sup>13</sup>C NMR (100 MHz, D<sub>2</sub>O) (Figure S3 B):  $\delta$ =141.1, 136.0, 132.8, 128.7, 123.6, 122.1, 63.3, 52.4, 35.6.

**Scheme S3.** Synthesis of the benzylbromide-tethered IL [MIMBBr]Br.

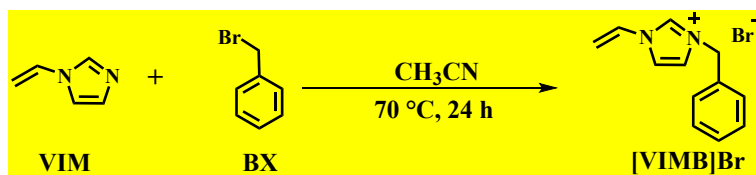

[VIMB]Br:  $^1\text{H}$  NMR (400 MHz,  $\text{D}_2\text{O}$ ) (Figure S4A):  $\delta$ = 7.65 (d, 1H), 7.43 (d, 1H), 7.37 (q, 4H), 7.01 (q, 1H), 5.68 (q, 2H), 5.31 (q, 4H).  $^{13}\text{C}$  NMR (100 MHz,  $\text{D}_2\text{O}$ ) (Figure S4B)  $\delta$ =129.3, 129.3, 128.6, 128.1, 122.7, 119.6, 109.4, 53.1.

**Scheme S4.** Synthesis of the benzyl-tethered IL [VIMB]Br.

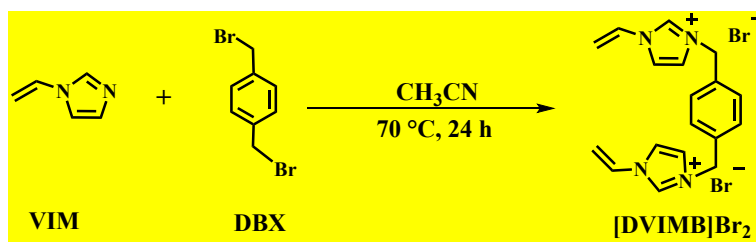

[DVIMB]Br<sub>2</sub>:  $^1\text{H}$  NMR (400 MHz,  $\text{D}_2\text{O}$ ) (Figure S5A):  $\delta$ =7.67 (d, 2H), 7.43 (d, 4H), 7.36 (s, 4H), 5.69 (t, 2H), 5.34 (t, 4H).  $^{13}\text{C}$  NMR (100 MHz,  $\text{D}_2\text{O}$ ) (Figure S5B)  $\delta$ =134.2, 129.4, 128.0, 122.8, 119.7, 109.5, 52.5.

**Scheme S5.** Synthesis of the bis-vinylimidazolium IL [DVIMB]Br<sub>2</sub>.

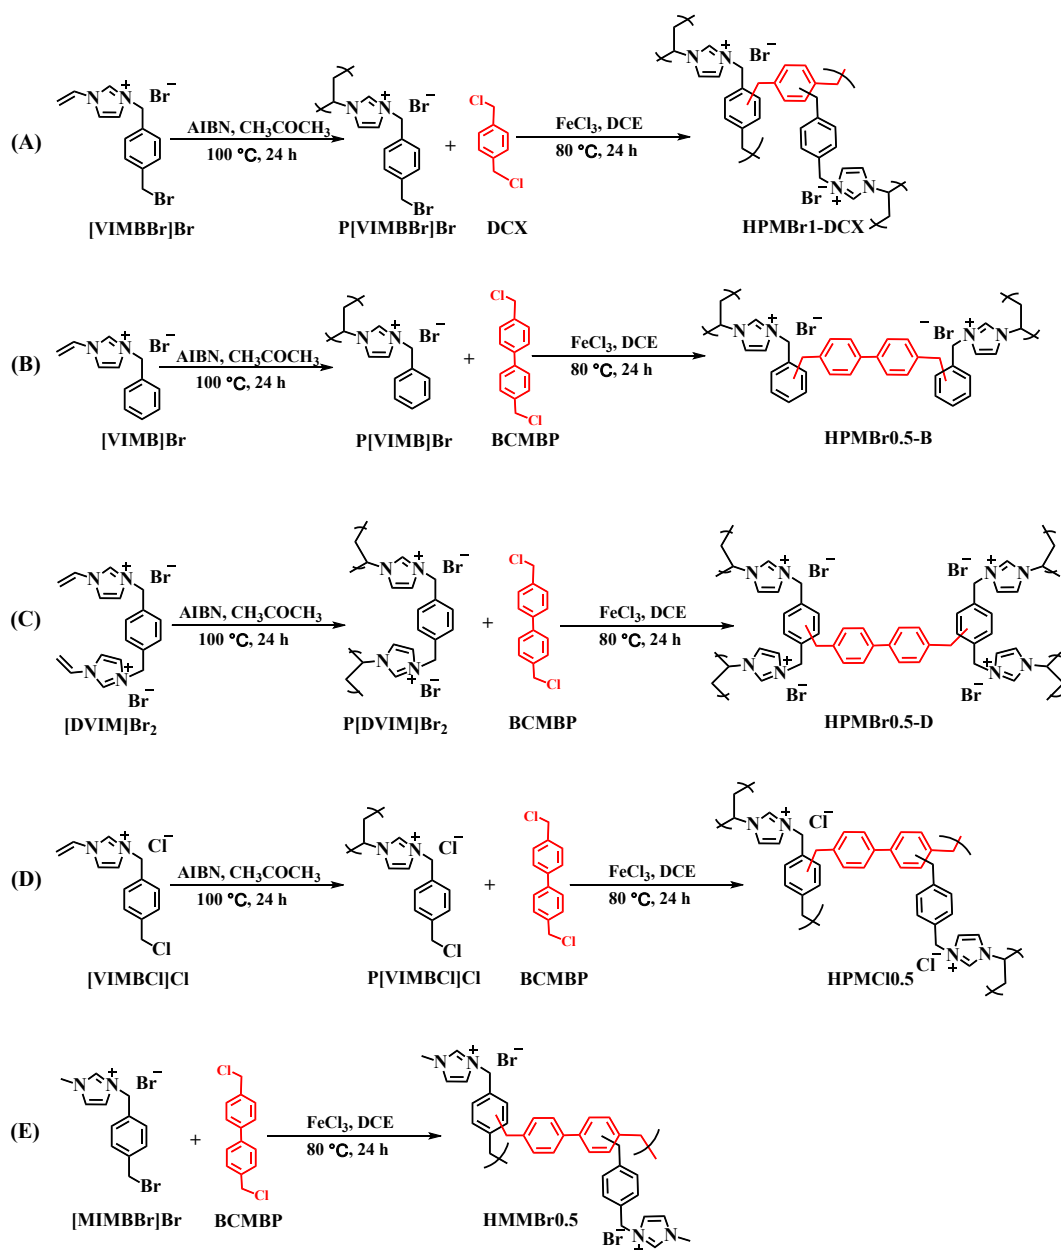

**Scheme S6.** Synthetic route to (A) HPMBr1-DCX, (B) HPMBr0.5-B, (C) HPMBr0.5-D, (D) HPMCl0.5 and (E) HMMBr0.5.

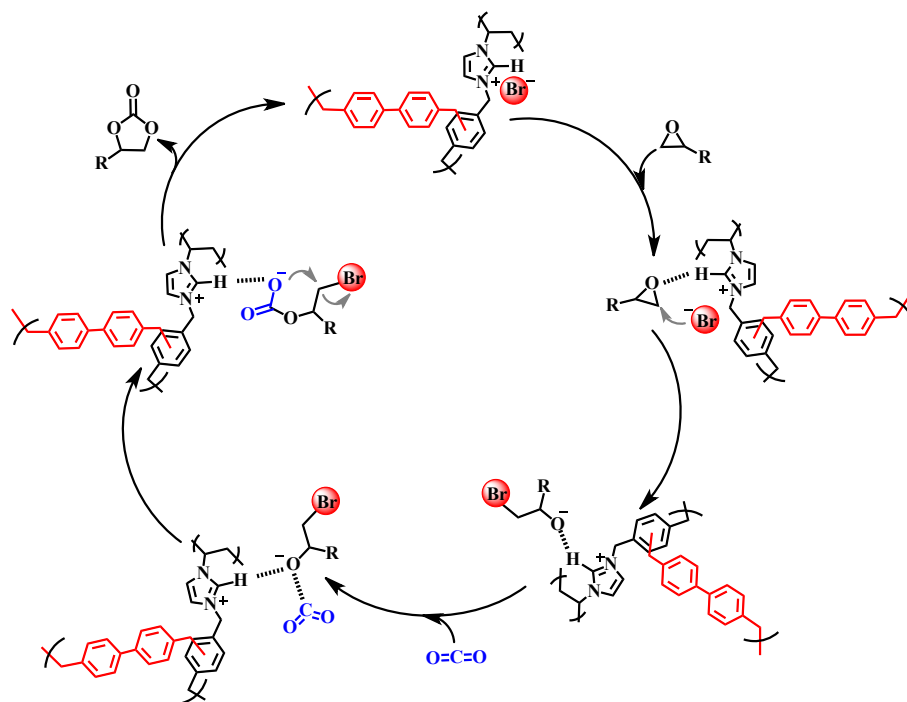

**Scheme S7.** Possible catalytic mechanism of CO<sub>2</sub> cycloaddition reaction over HPMBr<sub>0.5</sub>.

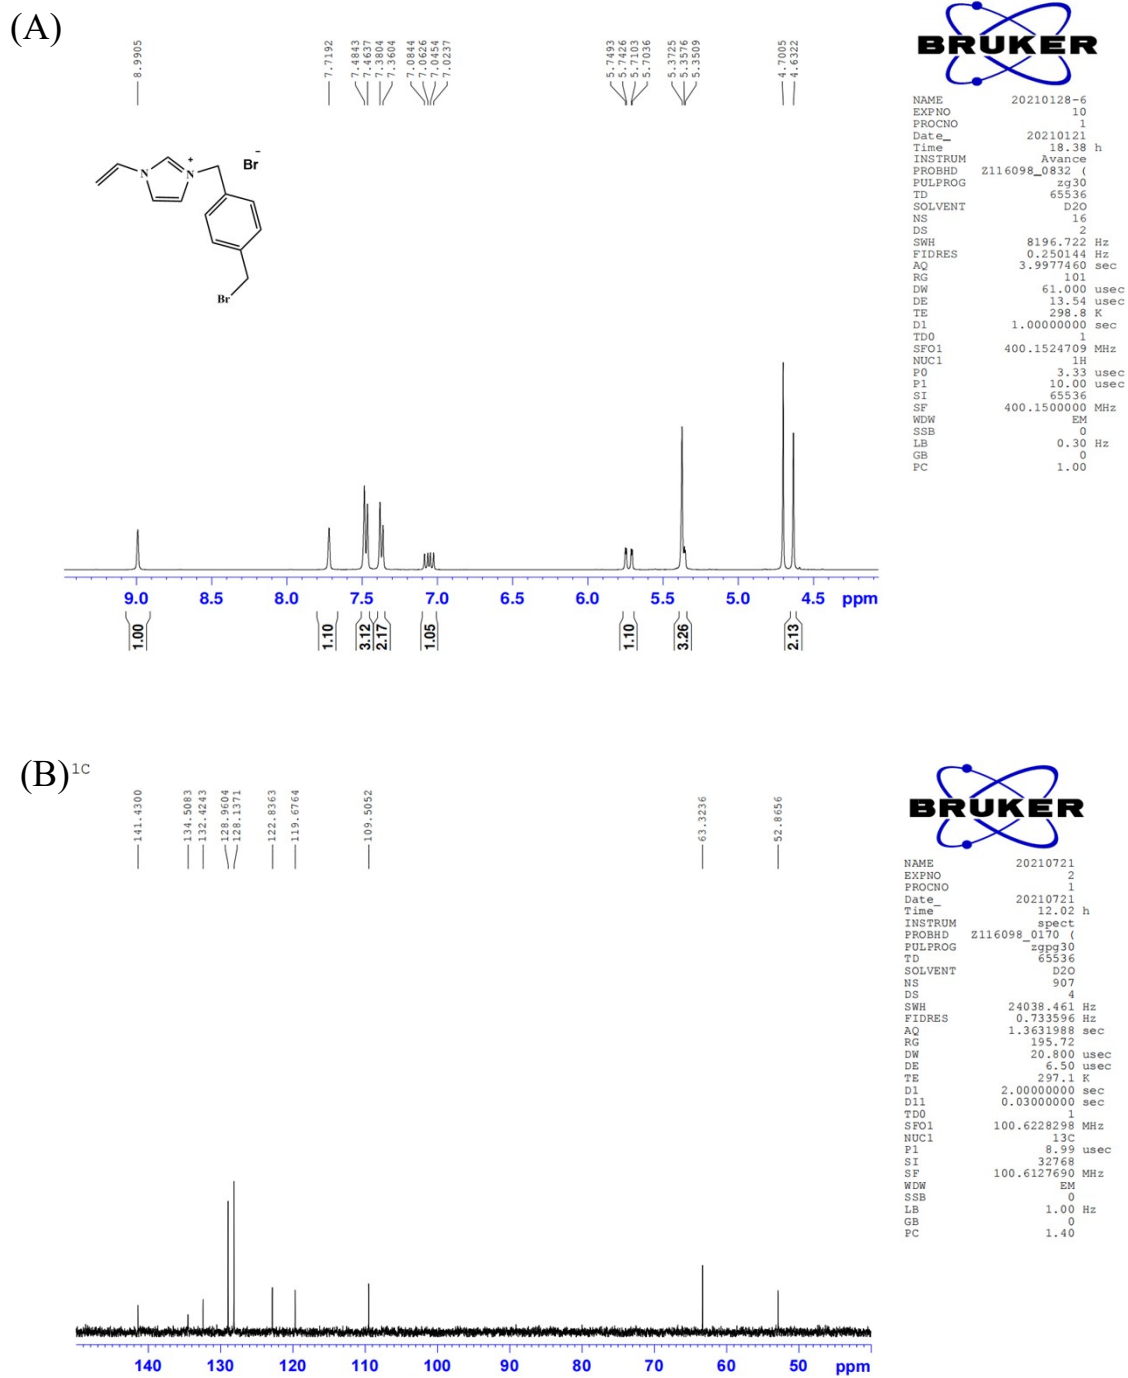

Figure S1. (A)  $^1\text{H}$  NMR and (B)  $^{13}\text{C}$  NMR of [VIMBBBr]Br using  $\text{D}_2\text{O}$  as the solvent.

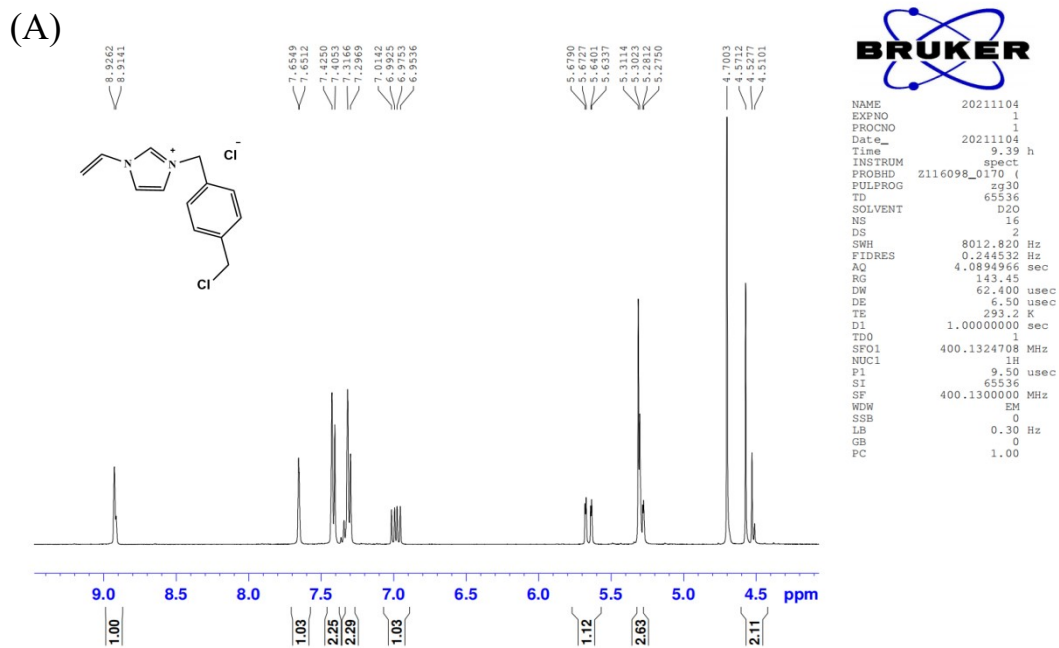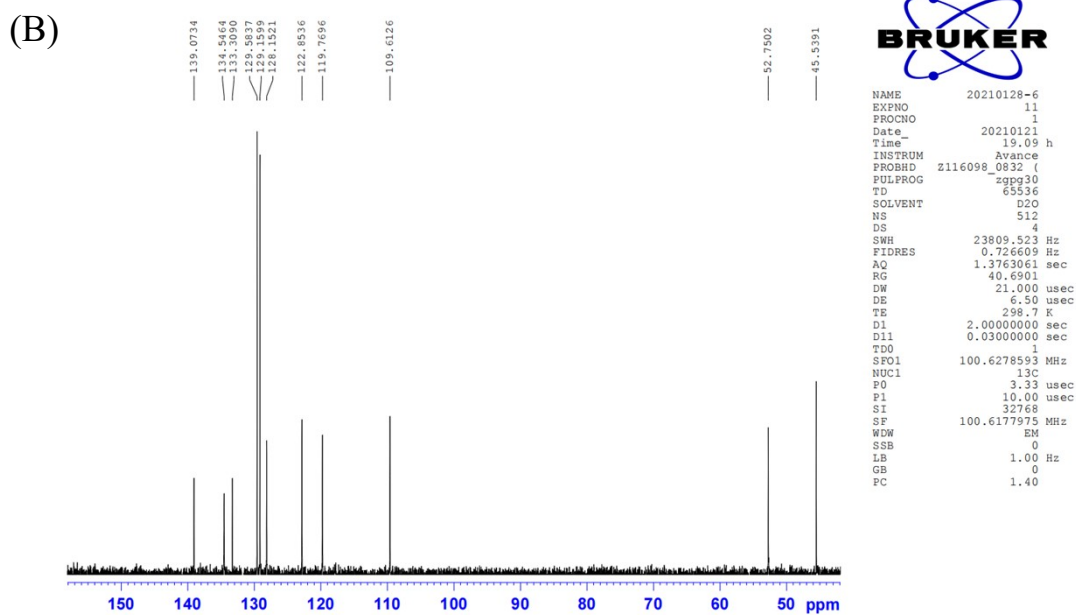

Figure S2. (A)  $^1\text{H}$  NMR and (B)  $^{13}\text{C}$  NMR of [VIMBCl]Cl using  $\text{D}_2\text{O}$  as the solvent.

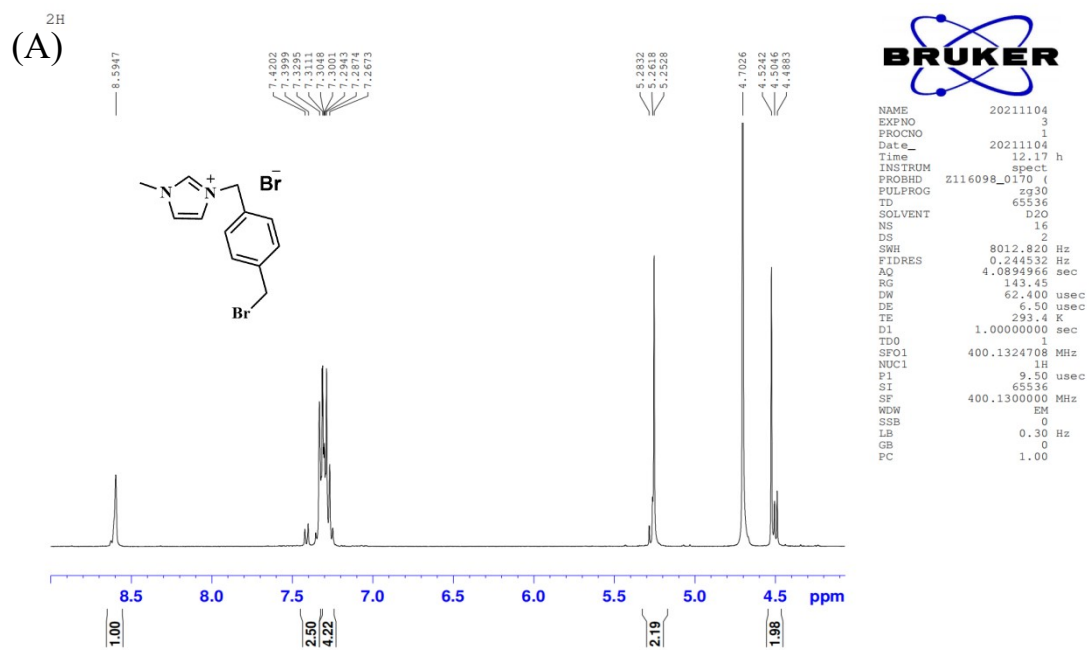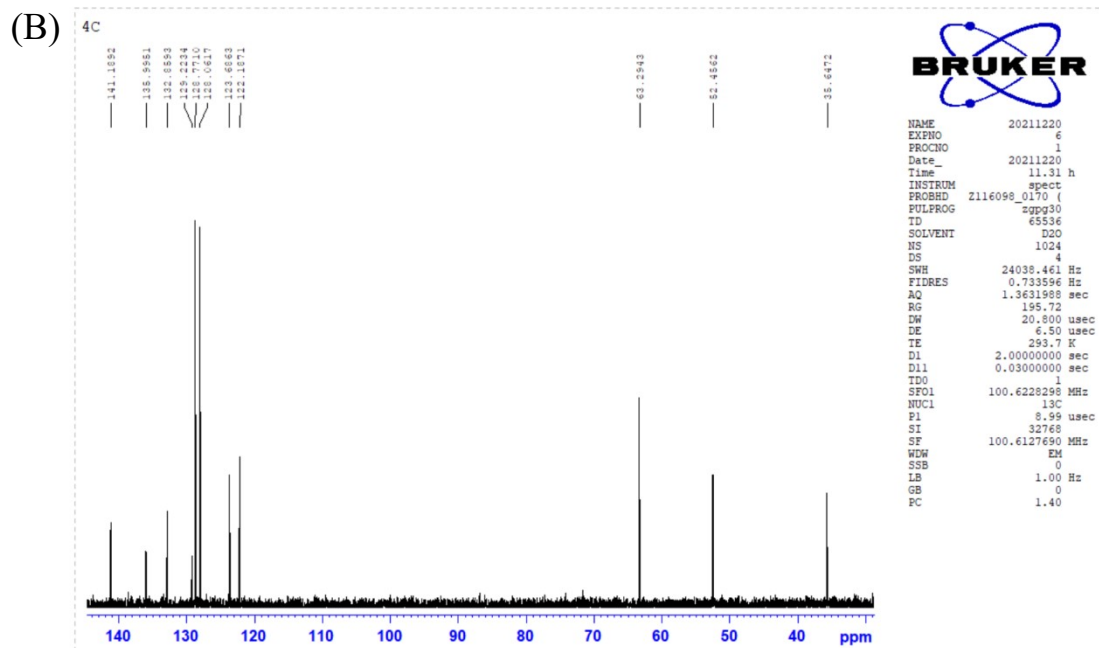

Figure S3. (A) <sup>1</sup>H NMR and (B) <sup>13</sup>C NMR of [MIMBBr]<sup>+</sup>Br<sup>-</sup> using D<sub>2</sub>O as the solvent.



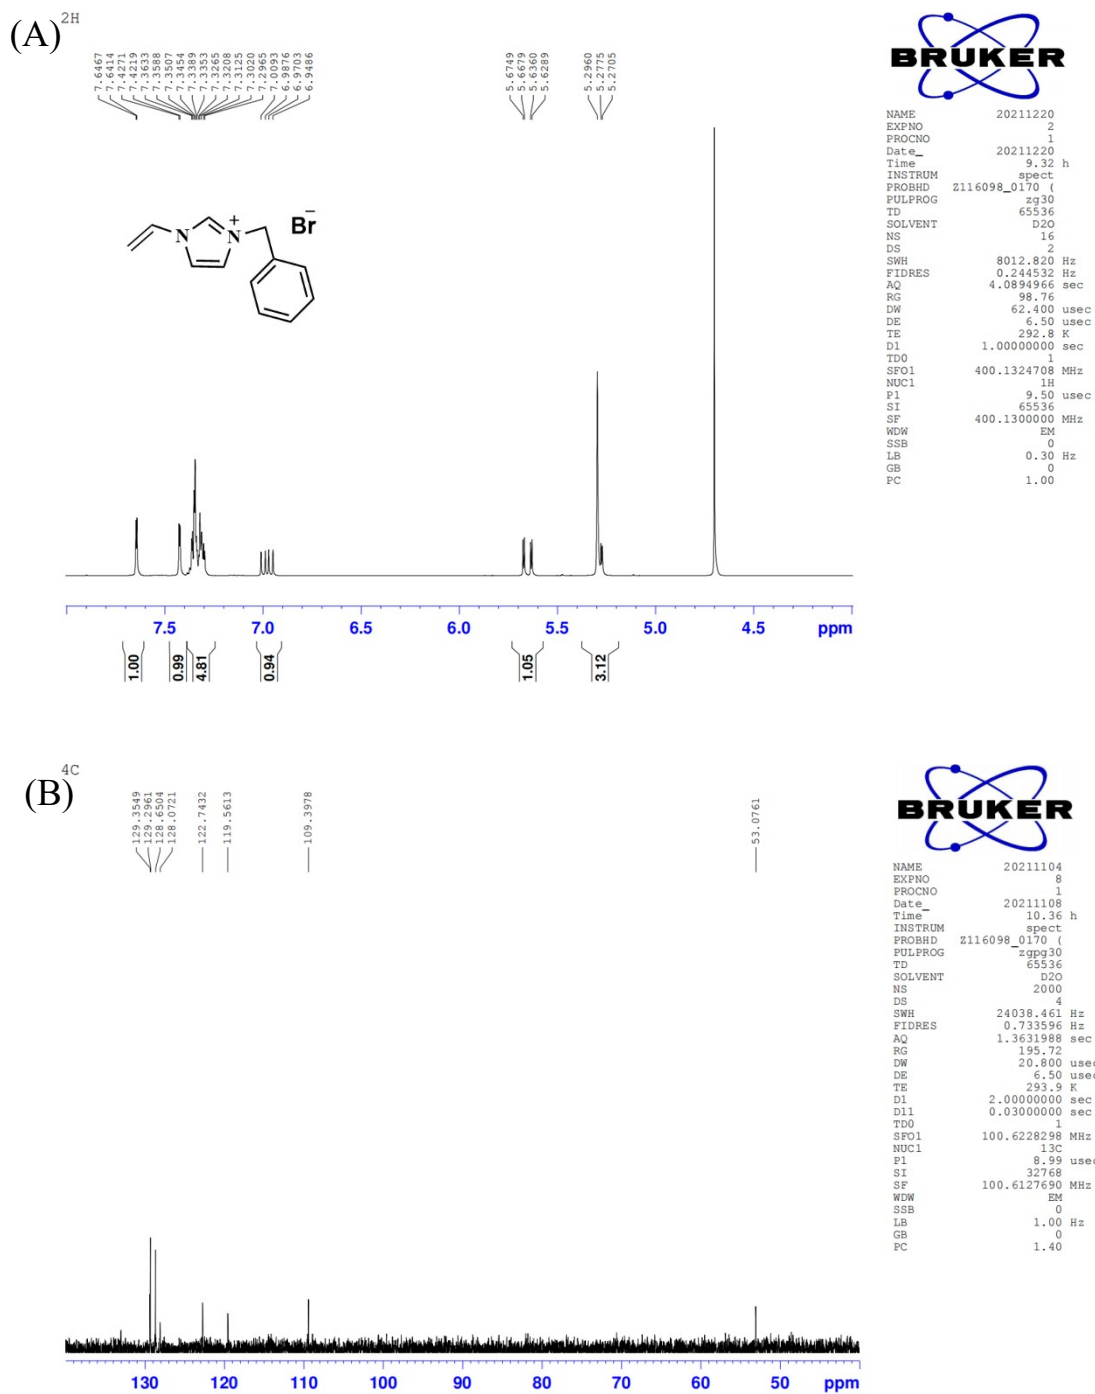

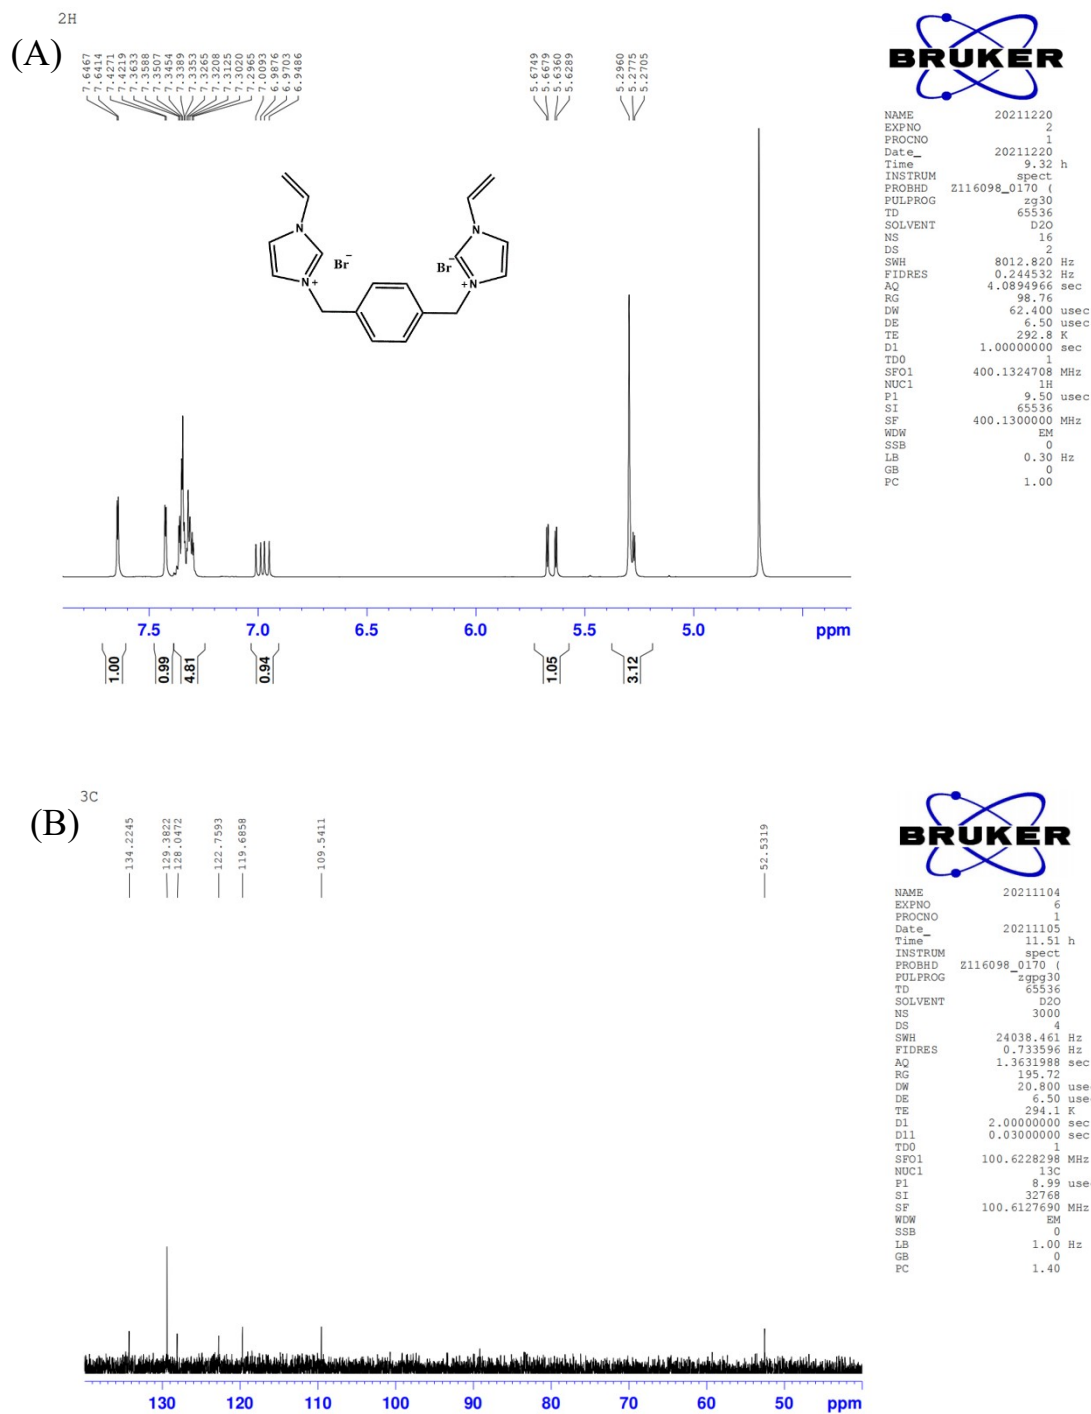

Figure S5. (A) <sup>1</sup>H NMR and (B) <sup>13</sup>C NMR of [DVIMB]Br<sub>2</sub> using D<sub>2</sub>O as the solvent.

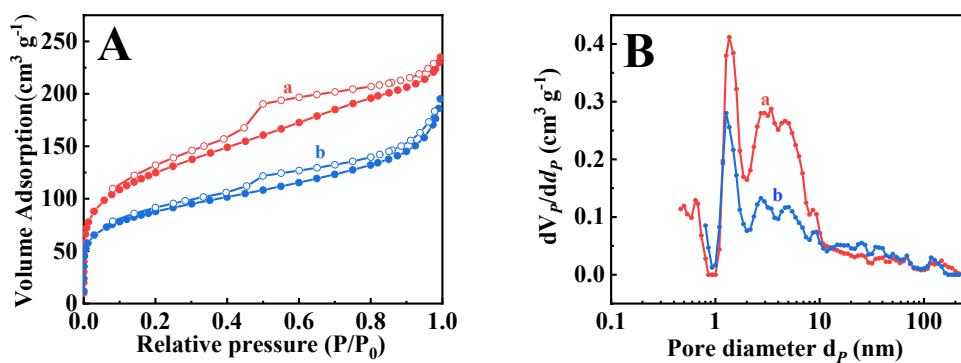

**Figure S6.** (A) Nitrogen sorption isotherms and (B) pore size distribution curves of HPMBr0.5 prepared with the molar composition of a) P[VIMBBr]Br/FeCl<sub>3</sub>/BCMBP=1:2:0.5 and b) [VIMBBr]Br/FeCl<sub>3</sub>/BCMBP=1: 8: 0.5.

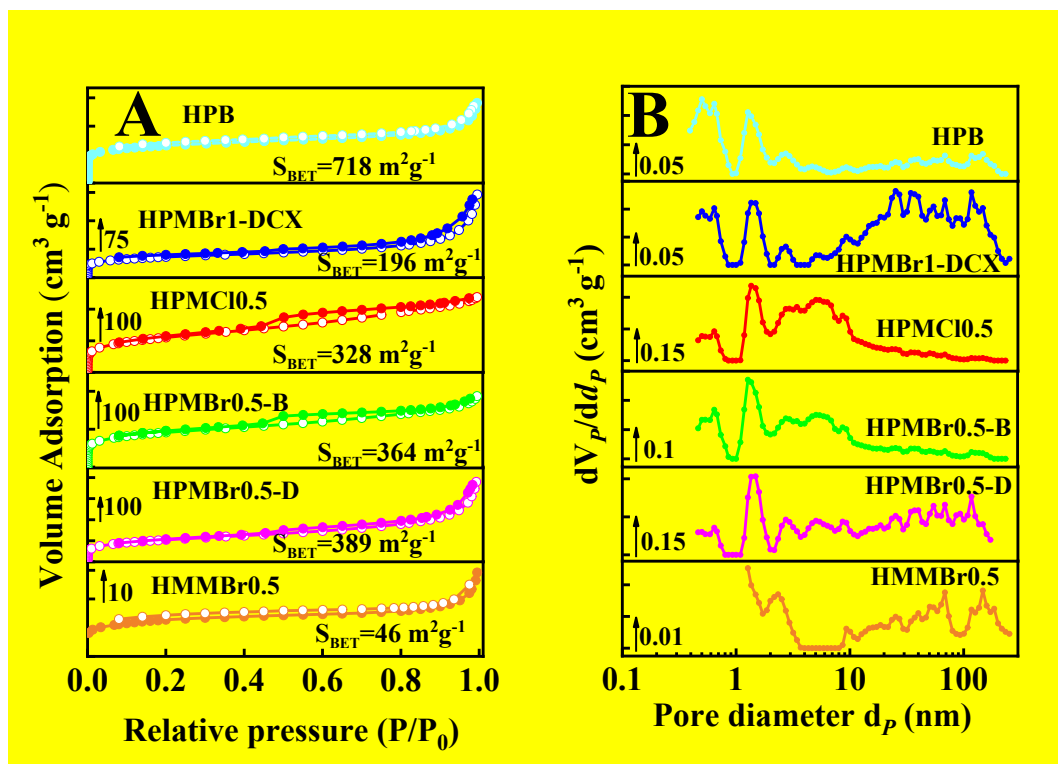

**Figure S7.** (A) Nitrogen sorption isotherms and (B) pore size distribution curves of HPB, HPMBr1-DCX, HPMCI0.5, HPMBr0.5-B, HPMBr0.5-D and HMMBR0.5.

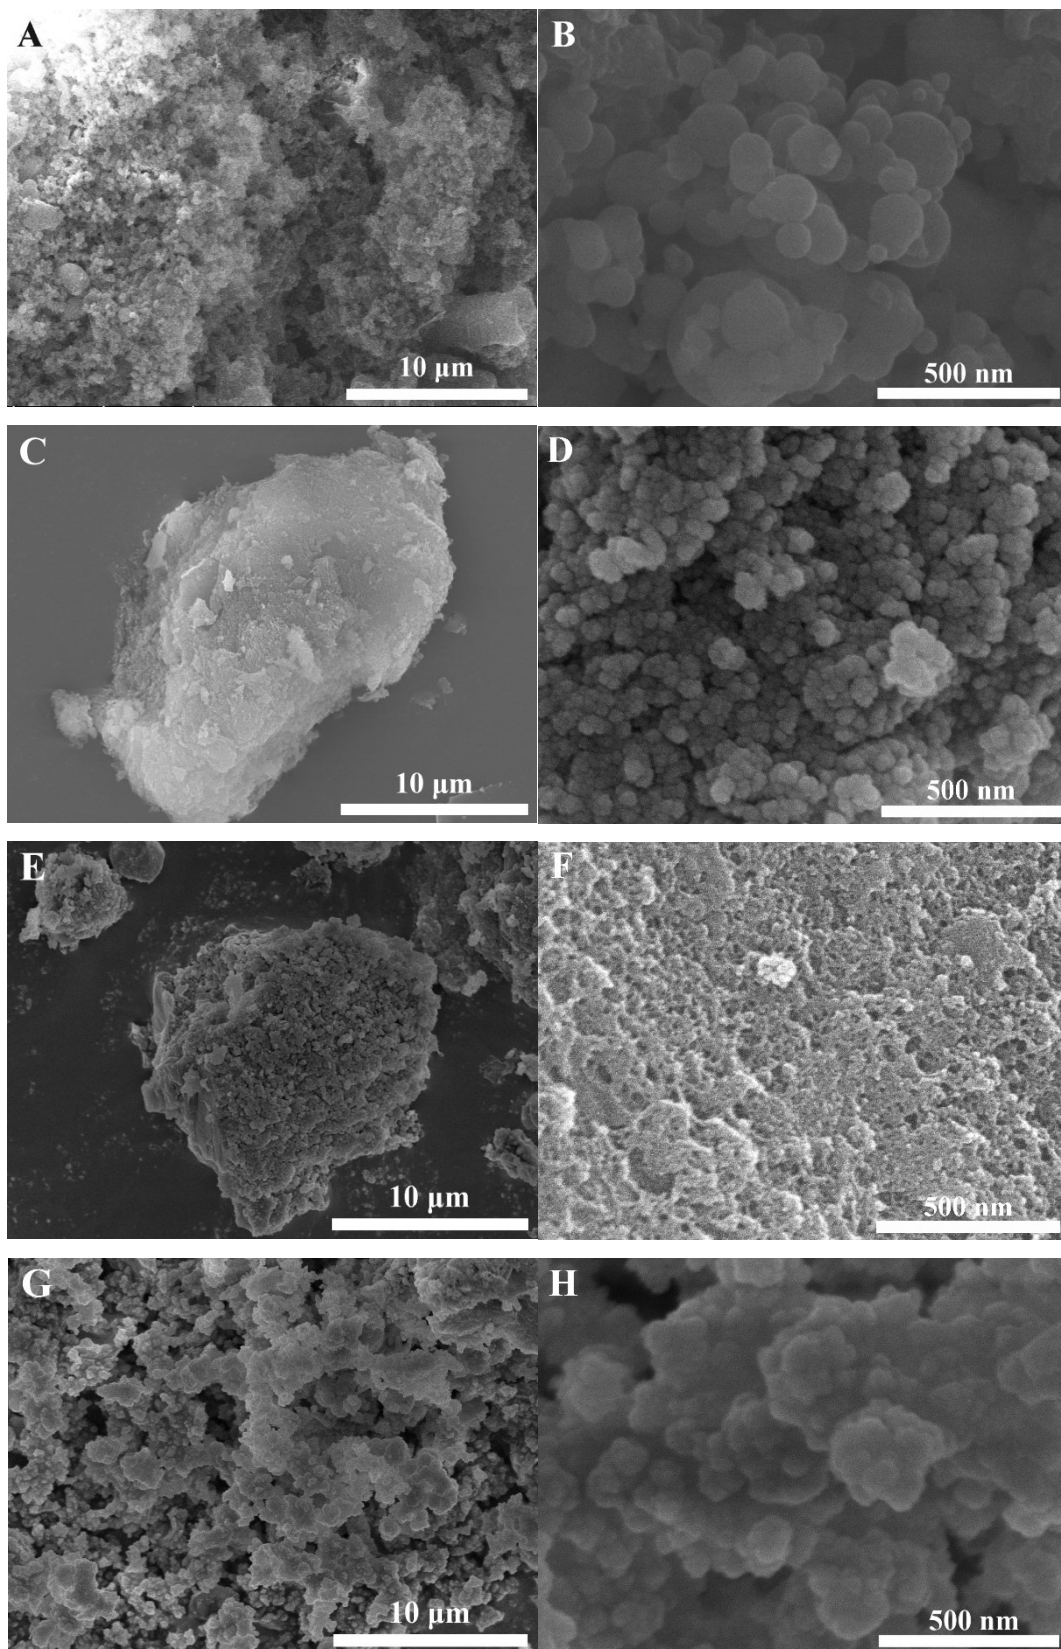

**Figure S8.** SEM images of (A, B) HPMBr0, (C, D) HPMBr0.3, (E, F) HPMBr0.75 and (G, H) HPB.

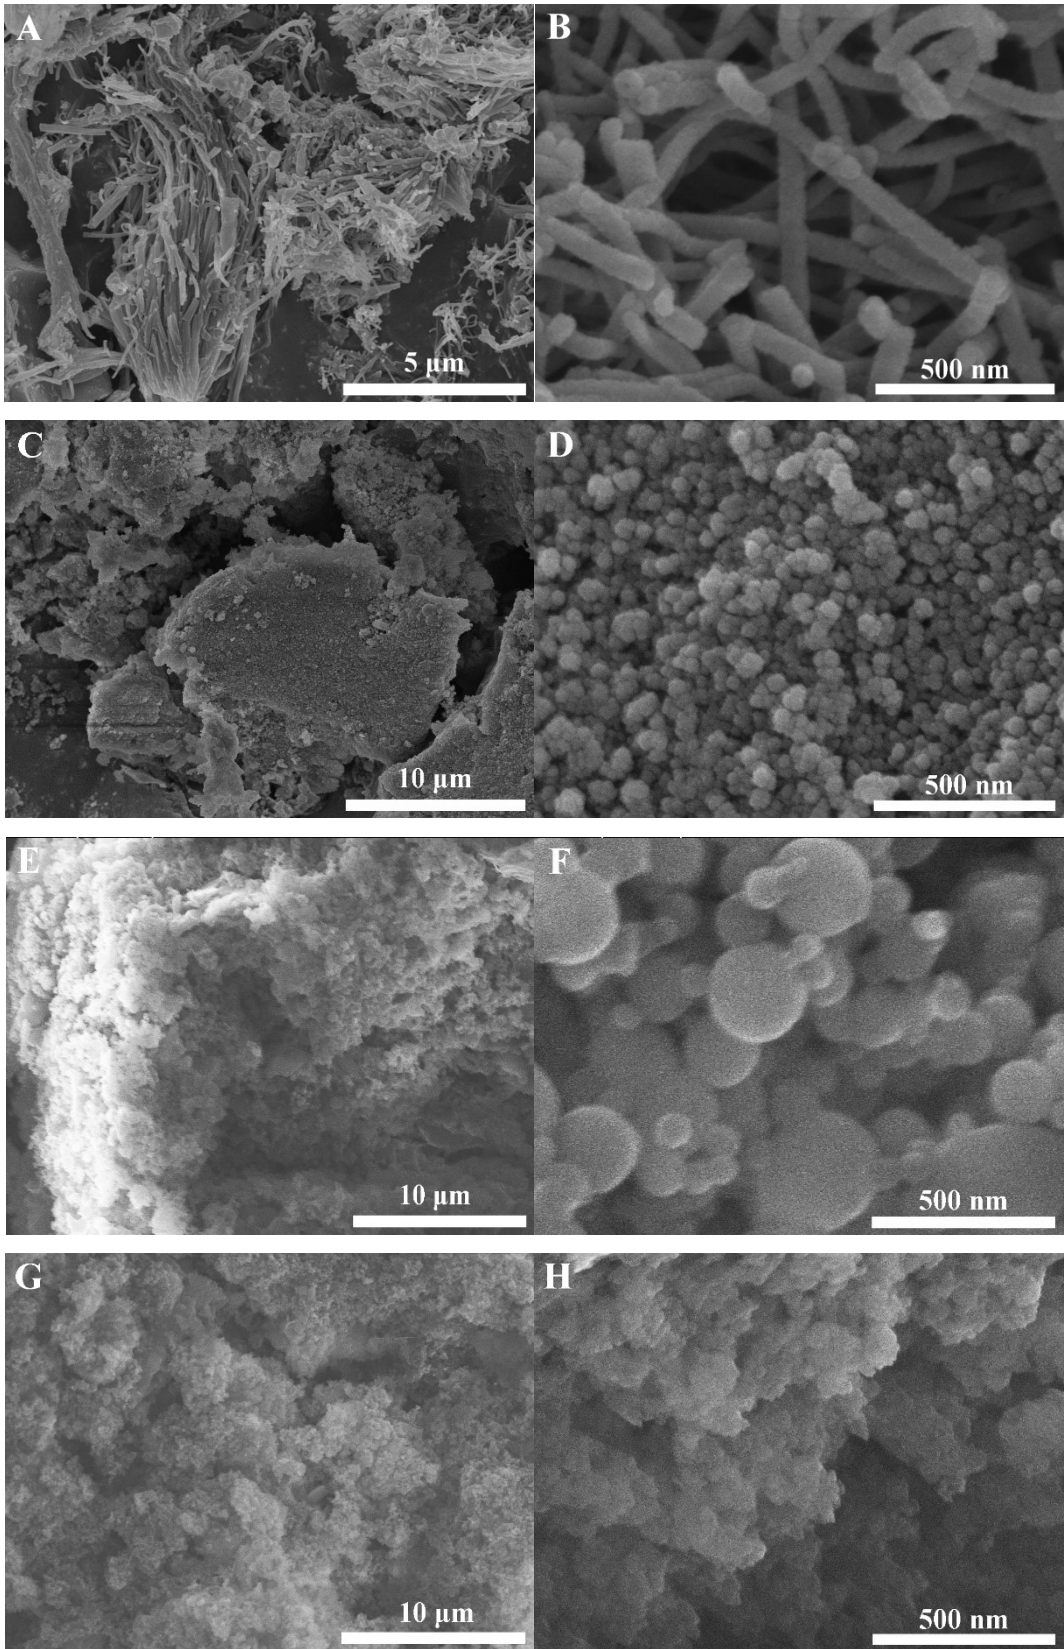

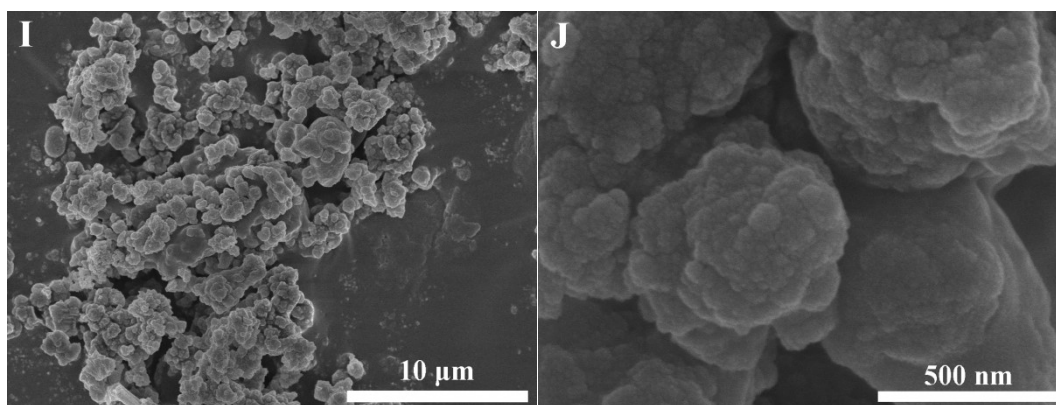

**Figure S9.** SEM images of (A, B) HPMCl<sub>0.5</sub>, (C, D) HPMBr<sub>1</sub>-DCX, (E, F) HPMBr<sub>0.5</sub>-B, (G, H) HPMBr<sub>0.5</sub>-D and (I, J) HMMBr<sub>0.5</sub>.

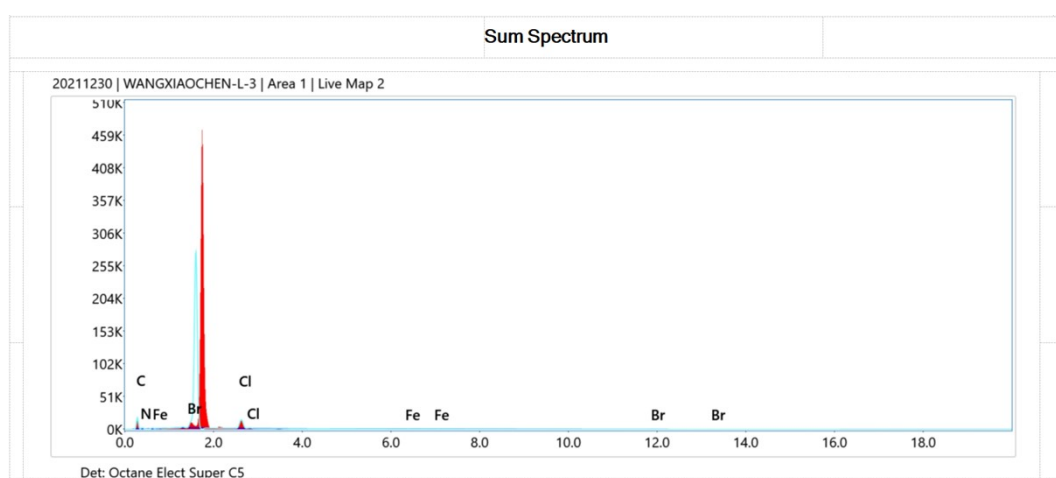

**Figure S10.** EDS spectrum of HPMBr<sub>0.5</sub>.



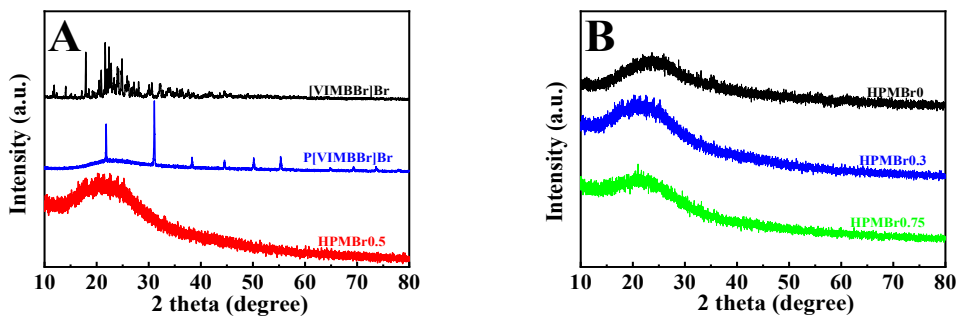

Figure S11. XRD patterns of [VIMBBr]Br, P[VIMBBr]Br and HPMBrx.

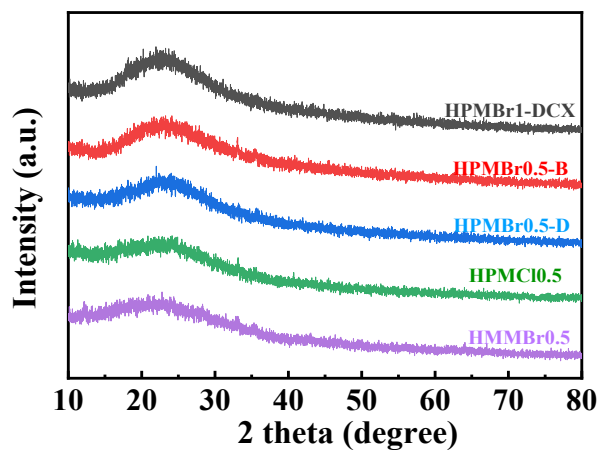

Figure S12. XRD patterns of HPMBr1-DCX, HPMBr0.5-B, HPMBr0.5-D, HPMCI0.5 and HMMBr0.5.

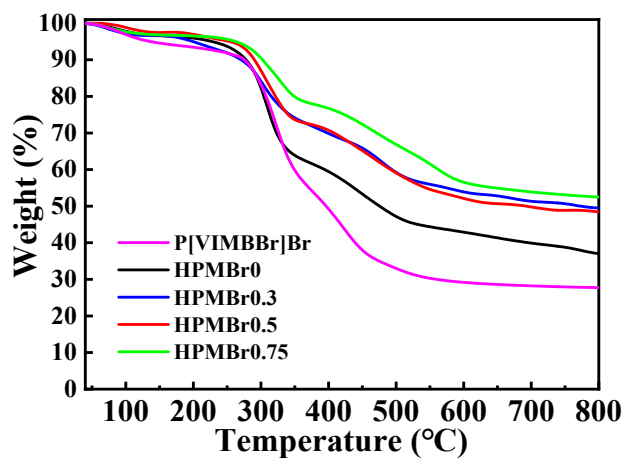

Figure S13. Thermogravimetry curves of P[VIMBBr]Br and HPMBrx.

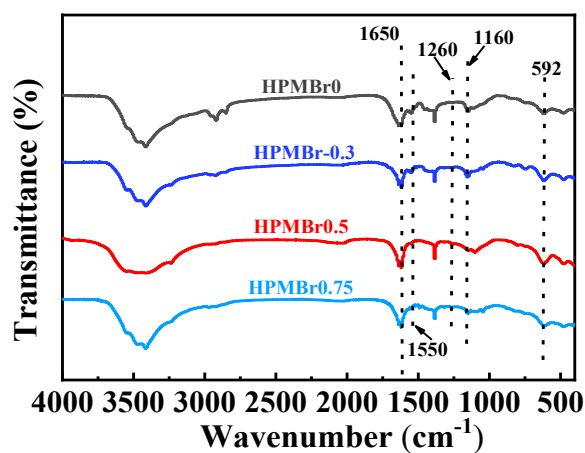

Figure S14. FT-IR spectra of HPMBrx.

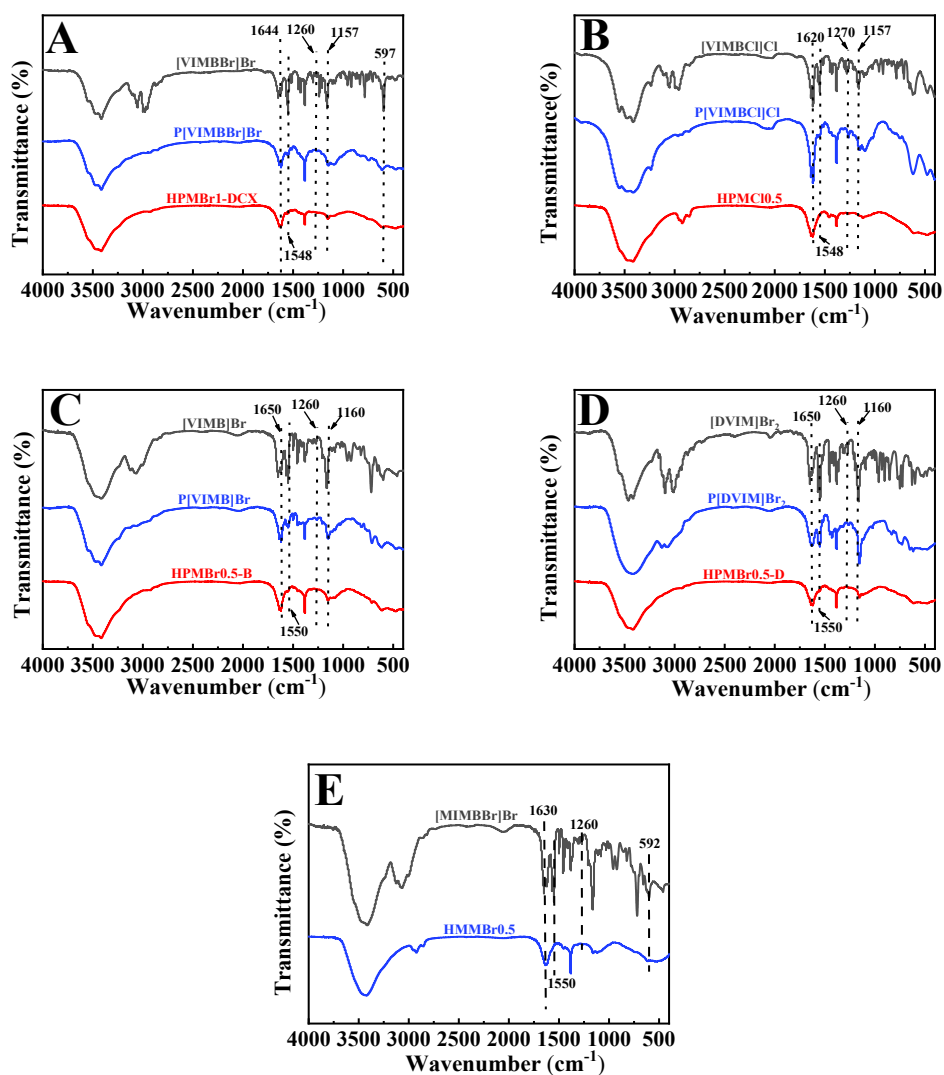

Figure S15. FT-IR spectra of control samples, corresponding IL monomers and linear precursors: (A) HPMBr1-DCX, (B) HPMCl0.5, (C) HPMBr0.5-B, (D) HPMBr0.5-D and (E) HMMBr0.5.



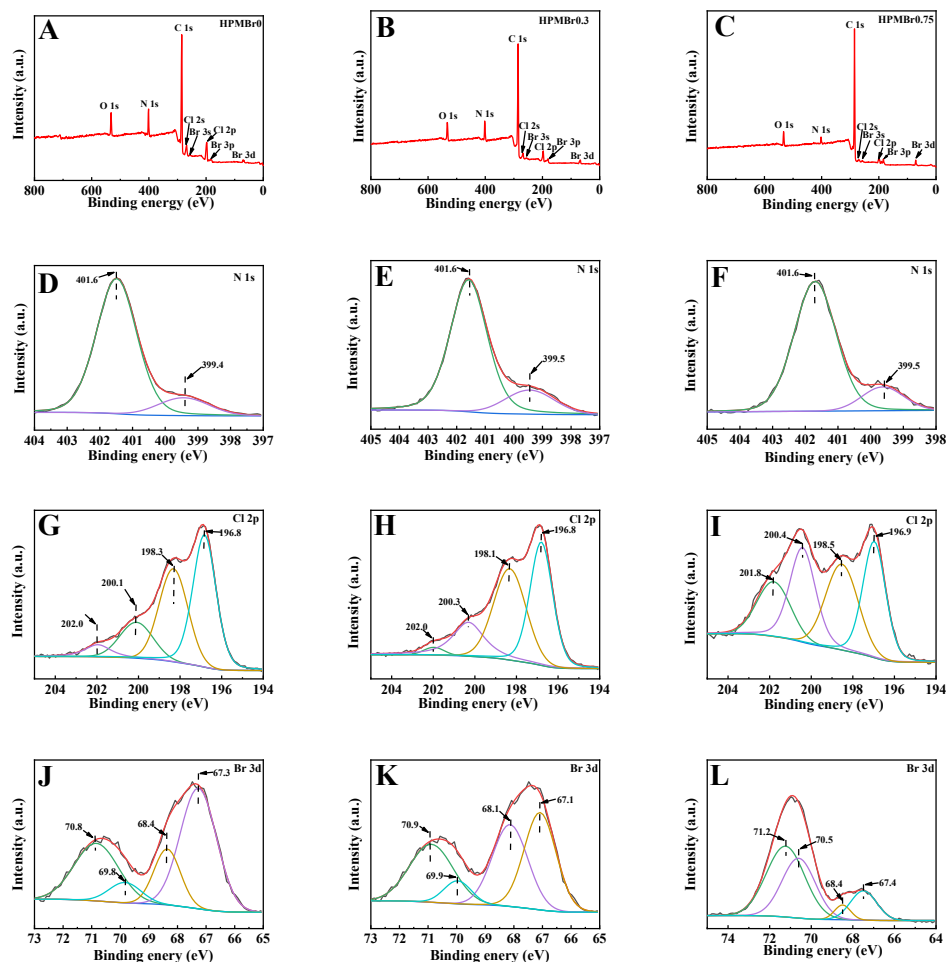

**Figure S16.** (A-C) XPS survey scan spectra, (D-F) N 1s, (G-I) Cl 2p and (J-L) Br 3d XPS spectra of HPMBr<sub>0</sub>, HPMBr<sub>0.3</sub> and HPMBr<sub>0.75</sub>, respectively.

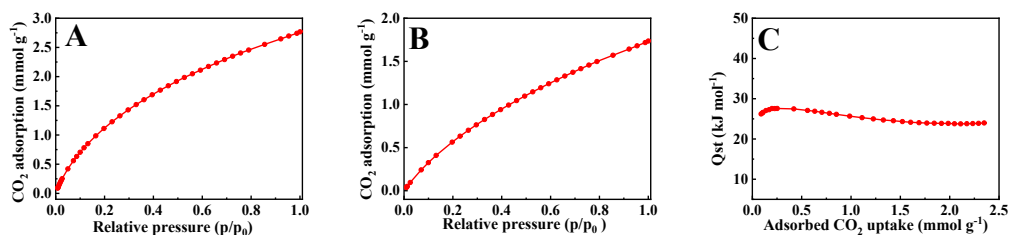

**Figure S17.** CO<sub>2</sub> sorption isotherms of HPB at (A) 273 K and (B) 298 K; (C) the CO<sub>2</sub> isosteric heat of adsorption ( $Q_{st}$ ) for HPB.

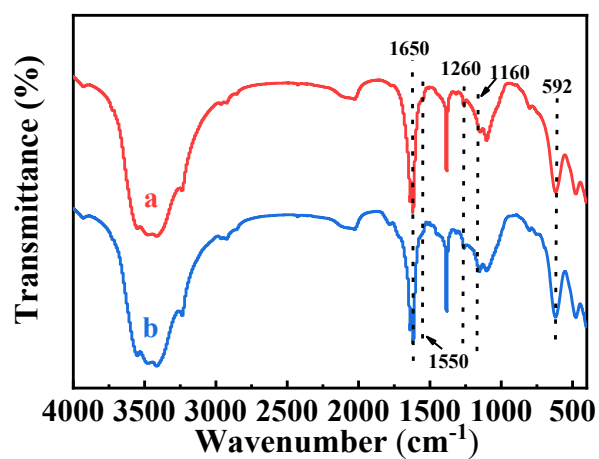

**Figure S18.** FT-IR spectra of a) fresh HPMBr0.5 and b) recovered HPMBr0.5 after 5th run.

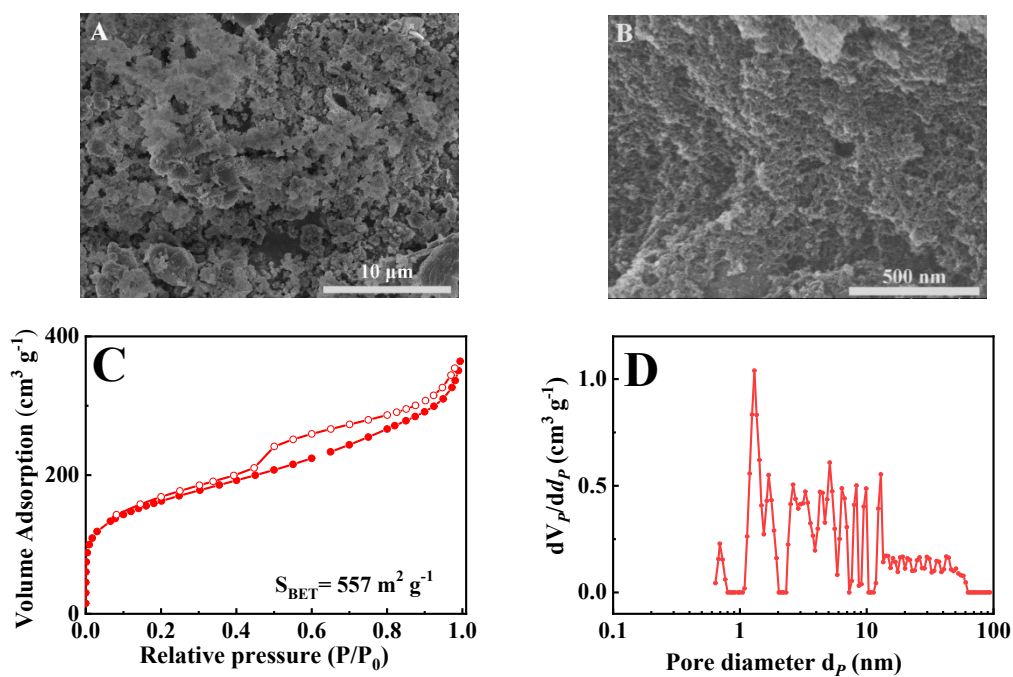

**Figure S19.** (A, B) SEM images, (C) N<sub>2</sub> sorption isotherm and (D) pore size distributions of recovered HPMBr0.5 after 5th run.

**Table S1.** Elemental analysis and synthetic yields for different samples.

| Sample          | N [%] | C [%] | H [%] | C/N ratio | C/H ratio | Yield <sup>a</sup> (%) |
|-----------------|-------|-------|-------|-----------|-----------|------------------------|
| [VIMBBr]Br      | 7.92  | 43.71 | 3.54  | 5.52      | 12.35     | ---                    |
| P[VIMBBr]Br     | 8.48  | 51.16 | 4.16  | 6.03      | 12.30     | 98                     |
| HPMBr0          | 8.15  | 51.14 | 5.72  | 6.27      | 8.94      | 56                     |
| HPMBr0.3        | 6.85  | 57.16 | 5.16  | 8.34      | 11.07     | 80                     |
| HPMBr0.5        | 6.46  | 64.32 | 5.59  | 9.95      | 11.49     | 88                     |
| HPMBr0.75       | 6.14  | 63.61 | 5.10  | 10.35     | 12.48     | 94                     |
| HPMBr1-DCX      | 5.95  | 62.73 | 5.03  | 10.54     | 12.47     | 74                     |
| HPMBr0.5-B      | 4.81  | 63.56 | 5.17  | 13.21     | 12.29     | 68                     |
| HPMBr0.5-D      | 8.72  | 52.25 | 4.72  | 5.99      | 11.07     | 70                     |
| HPMCl0.5        | 5.90  | 62.98 | 5.11  | 10.67     | 12.32     | 88                     |
| HMMBr0.5        | 5.00  | 68.98 | 5.15  | 13.79     | 13.39     | 63                     |
| Reused HPMBr0.5 | 6.11  | 59.43 | 4.78  | 9.73      | 12.43     | ---                    |

<sup>a</sup> The yield of polymer product.

**Table S2.** Textural properties of HPMBr0.5 prepared with the different molar composition of P[VIMBBr]Br, FeCl<sub>3</sub> and BCMBP.

| Entry | P[VIMBBr]Br /FeCl <sub>3</sub> /BCMBP <sup>a</sup> | S <sub>BET</sub> <sup>b</sup> (m <sup>2</sup> g <sup>-1</sup> ) | S <sub>micro</sub> <sup>c</sup> (m <sup>2</sup> g <sup>-1</sup> ) | V <sub>total</sub> <sup>d</sup> (cm <sup>3</sup> g <sup>-1</sup> ) | V <sub>micro</sub> <sup>c</sup> (cm <sup>3</sup> g <sup>-1</sup> ) | Micropore content <sup>e</sup> (%) | D <sub>ave</sub> <sup>f</sup> (nm) |
|-------|----------------------------------------------------|-----------------------------------------------------------------|-------------------------------------------------------------------|--------------------------------------------------------------------|--------------------------------------------------------------------|------------------------------------|------------------------------------|
| 1     | 1/2/0.5                                            | 437.78                                                          | 83.49                                                             | 0.28                                                               | 0.04                                                               | 14                                 | 3.32                               |
| 2     | 1/8/0.5                                            | 311.92                                                          | 99.45                                                             | 0.23                                                               | 0.04                                                               | 17                                 | 3.87                               |

<sup>a</sup> The molar composition of P[VIMBBr]Br, FeCl<sub>3</sub> and BCMBP. <sup>b</sup> BET surface area. <sup>c</sup> Micropore surface area and volume calculated by the t-plot method. <sup>d</sup> Total pore volume. <sup>e</sup> Calculated by V<sub>micro</sub>/V<sub>total</sub>. <sup>f</sup> Average pore size.

**Table S3.** Comparison of various poly(ionic liquid)s between the surface area and IL content.

| Entry     | Sample                            | S <sub>BET</sub><br>(m <sup>2</sup> g <sup>-1</sup> ) | IL content<br>(mmol g <sup>-1</sup> ) | Synthesis<br>approach  | Ref.        |
|-----------|-----------------------------------|-------------------------------------------------------|---------------------------------------|------------------------|-------------|
| <b>1</b>  | <b>HPMBr0.5</b>                   | <b>558</b>                                            | <b>2.31</b>                           | <b>FCA<sup>c</sup></b> | <b>This</b> |
| <b>2</b>  | <b>HPMBr0.75</b>                  | <b>855</b>                                            | <b>2.19</b>                           | <b>FCA</b>             | <b>This</b> |
| 3         | poly[bvbim]Cl                     | 24.18                                                 | 2.53 <sup>a</sup>                     | FRP <sup>d</sup>       | [1]         |
| 4         | PDMBr                             | 205                                                   | 2.57 <sup>b</sup>                     | FRP                    | [2]         |
| 5         | PIL <sub>1:1</sub>                | 86.21                                                 | 2.21 <sup>a</sup>                     | FRP                    | [3]         |
| 6         | IP 3                              | 91.56                                                 | 1.69 <sup>b</sup>                     | FRP                    | [4]         |
| 7         | PQP                               | 520                                                   | 2.02 <sup>b</sup>                     | FRP                    | [5]         |
| 8         | PDBA-Cl-SCD                       | 211                                                   | 1.44 <sup>a</sup>                     | FRP                    | [6]         |
| 9         | PVIm-6-SCD                        | 797.7                                                 | 0.54 <sup>a</sup>                     | FRP                    | [7]         |
| 10        | PAD-3                             | 156                                                   | 2.32                                  | FRP                    | [8]         |
| 11        | [PAD][IDA]                        | 132                                                   | 1.72                                  | FRP                    | [9]         |
| 12        | PIL-4                             | 1.97                                                  | 1.25                                  | FRP                    | [10]        |
| 13        | AE-PIL-Cl                         | 227.5                                                 | 1.90                                  | FRP                    | [11]        |
| 14        | PGDBr-5-2OH                       | 218                                                   | 1.88                                  | FRP                    | [12]        |
| 15        | P-HVD-2/3/5                       | 8.61                                                  | 3.53                                  | FRP                    | [13]        |
| 16        | PADV-2                            | 105                                                   | 2.01                                  | FRP                    | [14]        |
| 17        | PDVB-[AlTMG]Br-0.2                | 152                                                   | 1                                     | FRP                    | [15]        |
| 18        | POM3-IM                           | 575                                                   | 1.01 <sup>b</sup>                     | FCA                    | [16]        |
| 19        | Polymers 3                        | 904                                                   | 0.48 <sup>b</sup>                     | FCA                    | [17]        |
| 20        | Poly-NHC-2-Pd <sup>2+</sup>       | 569                                                   | 0.52                                  | FCA                    | [18]        |
| 21        | HCP-IL-7                          | 447                                                   | 0.70                                  | FCA                    | [19]        |
| 22        | HIP-Br-2                          | 534                                                   | 0.3                                   | FCA                    | [20]        |
| 23        | POPs-B10                          | 824                                                   | 0.81 <sup>b</sup>                     | FCA                    | [21]        |
| <b>24</b> | <b>NHC-CAP-1(Zn<sup>2+</sup>)</b> | <b>1040</b>                                           | <b>1.51</b>                           | <b>FCA</b>             | <b>[22]</b> |
| <b>25</b> | <b>I<sub>2</sub>HCP-5b</b>        | <b>1017</b>                                           | <b>0.8</b>                            | <b>FCA</b>             | <b>[23]</b> |
| <b>26</b> | <b>HCP-V2</b>                     | <b>750</b>                                            | <b>0.50<sup>b</sup></b>               | <b>FCA</b>             | <b>[24]</b> |
| <b>27</b> | <b>HPILs-Cl-2</b>                 | <b>500</b>                                            | <b>1.24<sup>b</sup></b>               | <b>FCA</b>             | <b>[25]</b> |
| <b>28</b> | <b>CPIP-A-4</b>                   | <b>570</b>                                            | <b>0.53</b>                           | <b>FCA</b>             | <b>[26]</b> |
| <b>29</b> | <b>IHCP-OH(1)</b>                 | <b>515</b>                                            | <b>0.78</b>                           | <b>FCA</b>             | <b>[27]</b> |
| <b>30</b> | <b>Bi/HCP<sub>B</sub></b>         | <b>945.59</b>                                         | <b>0.21<sup>b</sup></b>               | <b>FCA</b>             | <b>[28]</b> |
| <b>31</b> | <b>Py-HCP-Br</b>                  | <b>435</b>                                            | <b>0.76<sup>b</sup></b>               | <b>FCA</b>             | <b>[29]</b> |
| <b>32</b> | <b>HP-[C4PhIm]Br-DCX-2</b>        | <b>763</b>                                            | <b>0.9</b>                            | <b>FCA</b>             | <b>[30]</b> |
| <b>33</b> | <b>PiP@QA</b>                     | <b>301</b>                                            | <b>1.89</b>                           | <b>FCA</b>             | <b>[31]</b> |
| <b>34</b> | <b>DHI-CSU-3-Br</b>               | <b>1216</b>                                           | <b>1.21<sup>b</sup></b>               | <b>FCA</b>             | <b>[32]</b> |
| <b>35</b> | <b>[HCP-CH2-Im][Cl]-1</b>         | <b>385</b>                                            | <b>2.10</b>                           | <b>FCA</b>             | <b>[33]</b> |
| <b>36</b> | <b>PIP-3</b>                      | <b>1021.9</b>                                         | <b>1.01</b>                           | <b>FCA</b>             | <b>[34]</b> |
| <b>37</b> | <b>iPT-2</b>                      | <b>810</b>                                            | <b>0.57</b>                           | <b>FCA</b>             | <b>[35]</b> |
| <b>38</b> | <b>HIP-</b>                       | <b>323</b>                                            | <b>0.81</b>                           | <b>FCA</b>             | <b>[36]</b> |
| <b>39</b> | <b>HIP-Cl(3)-OH</b>               | <b>596</b>                                            | <b>0.97</b>                           | <b>FCA</b>             | <b>[37]</b> |
| <b>40</b> | <b>iPHCP-12</b>                   | <b>537</b>                                            | <b>0.98</b>                           | <b>FCA</b>             | <b>[38]</b> |
| <b>41</b> | <b>IHCP-2</b>                     | <b>812</b>                                            | <b>0.24<sup>b</sup></b>               | <b>FCA</b>             | <b>[39]</b> |

<sup>a</sup> Estimated from their IL units. <sup>b</sup> Determined from CHN elemental analysis in reference. <sup>c</sup> Free-radical polymerization. <sup>d</sup> Friedel-Crafts alkylation.

**Table S4.** CO<sub>2</sub> adsorption performance of various polymers.

| Entry | Sample       | CO <sub>2</sub> uptake <sup>a</sup>  | Q <sub>st</sub> <sup>b</sup> |
|-------|--------------|--------------------------------------|------------------------------|
|       |              | (mmol g <sup>-1</sup> )<br>273/298 K | (KJ mmol <sup>-1</sup> )     |
| 1     | P[VIMBBBr]Br | 0.08/0.03                            | --- <sup>c</sup>             |
| 2     | HPMBr0       | 0.70/0.47                            | 44                           |
| 3     | HPMBr0.3     | 0.87/0.52                            | 53                           |
| 4     | HPMBr0.5     | 1.74/0.93                            | 44                           |
| 5     | HPMBr0.75    | 1.83/0.94                            | 38                           |
| 6     | HPB          | 2.83/1.78                            | 26                           |
| 7     | HPMBr1-DCX   | 1.36/0.84                            | 42                           |
| 8     | HPMCl0.5     | 1.26/0.80                            | 35                           |
| 9     | HPMBr0.5-B   | 1.16/0.63                            | 43                           |
| 10    | HPMBr0.5-D   | 1.26/0.72                            | 45                           |
| 11    | HMMBr0.5     | 1.40/0.79                            | 46                           |

<sup>a</sup> CO<sub>2</sub> uptakes at 273 K and 298 K (0.1MPa). <sup>b</sup> Calculated by the Clausius-Clapeyron equation. <sup>c</sup> Negligible.

**Table S5.** Catalytic performances of control samples for CO<sub>2</sub> cycloaddition with ECH.<sup>a</sup>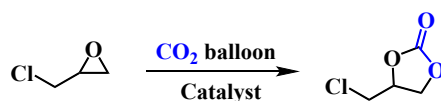

| Entry | Sample     | Con. <sup>b</sup><br>(%) | Sel. <sup>c</sup><br>(%) |
|-------|------------|--------------------------|--------------------------|
| 1     | HPB        | 0                        | 0                        |
| 2     | HPMBr-DCX  | 81.8                     | 96.5                     |
| 3     | HPMBr0.5-B | 91.5                     | 97.6                     |
| 4     | HPMBr0.5-D | 84.3                     | 96.9                     |
| 5     | HPMCl0.5   | 68.7                     | 98.7                     |
| 6     | HMMBr0.5   | 96.3                     | 98.9                     |

<sup>a</sup> Reaction condition: catalyst (15 mg), ECH (5 mmol), 80 °C, 24 h, CO<sub>2</sub> (0.1MPa). <sup>b</sup> The conversion and selectivity determined by GC.

**Table S6.** Catalytic activity of recent metal-solvent-additive-free heterogeneous catalyst for cycloaddition of CO<sub>2</sub> under atmospheric pressure.

| Entry    | Catalyst                        | Epoxide    | Temp. (°C) | Time (h)  | Yield (%)   | TOF <sup>a</sup> (h <sup>-1</sup> ) | Ref.             |
|----------|---------------------------------|------------|------------|-----------|-------------|-------------------------------------|------------------|
| <b>1</b> | <b>HPMBr0.5</b>                 | <b>ECH</b> | <b>80</b>  | <b>24</b> | <b>99.0</b> | <b>6.0</b>                          | <b>This work</b> |
| <b>2</b> |                                 | <b>SO</b>  | <b>80</b>  | <b>36</b> | <b>94.7</b> | <b>3.8</b>                          |                  |
| 3        | PDMBr                           | ECH        | 70         | 48        | 91.3        | 0.73                                | [2]              |
| 4        |                                 | SO         | 120        | 12        | 80.2        | 2.6                                 |                  |
| 5        | IP 3                            | ECH        | 100        | 24        | 99          | 1.0                                 | [4]              |
| 6        |                                 | SO         | 100        | 24        | 87          | 0.9                                 |                  |
| 7        | PDDBA-Cl-SCD                    | ECH        | 90         | 6         | 99.4        | 3.4                                 | [6]              |
| 8        |                                 | SO         | 90         | 6         | 97.8        | 3.3                                 |                  |
| 9        | PVIm-6-SCD                      | ECH        | 50         | 24        | 98.2        | 1.4                                 | [7]              |
| 10       |                                 | SO         | 80         | 18        | 97.9        | 1.4                                 |                  |
| 11       | PAD-3                           | ECH        | 70         | 24        | 98          | 0.88                                | [8]              |
| 12       |                                 | SO         | 110        | 8         | 92          | 2.4                                 |                  |
| 13       | PGDBr-5-2OH                     | ECH        | 70         | 24        | 91          | 1.9                                 | [12]             |
| 14       |                                 | SO         | 70         | 96        | 90          | 0.49                                |                  |
| 15       | PADV-2                          | ECH        | 50         | 24        | 87          | 3.8                                 | [14]             |
| 16       |                                 | SO         | 90         | 24        | 96          | 3.4                                 |                  |
| 17       | [HCP-CH2-Im][Cl]-1              | ECH        | 140        | 4         | 99          | 2.6                                 | [33]             |
| 18       |                                 | SO         | 100        | 20        | 93          | 0.74                                |                  |
| 19       | HIP-Cl(3)-OH                    | SO         | 100        | 20        | 98          | 2.3                                 | [37]             |
| 20       | iPHCP-12                        | ECH        | 60         | 60        | 99          | 0.67                                | [38]             |
| 21       |                                 | SO         | 80         | 60        | 95          | 0.64                                |                  |
| 22       | DB10%-Pa-Tp                     | ECH        | 120        | 96        | 99          | 4.4                                 | [40]             |
| 23       | COP-222                         | ECH        | 100        | 24        | 99          | 1.2                                 | [41]             |
| 24       |                                 | SO         | 100        | 24        | 99          | 1.2                                 |                  |
| 25       | COF-IL                          | ECH        | 80         | 48        | 98          | 0.68                                | [42]             |
| 26       |                                 | SO         | 80         | 48        | 98          | 0.68                                |                  |
| 27       | [PDVB-HAVIM-C <sub>18</sub> ]Br | ECH        | 80         | 16        | 96.4        | 4.3                                 | [43]             |
| 28       |                                 | SO         | 80         | 30        | 93.5        | 2.2                                 |                  |
| 29       | IM-iPHP-2                       | ECH        | 80         | 48        | 96          | 1.4                                 | [44]             |
| 30       |                                 | SO         | 80         | 72        | 84          | 0.85                                |                  |
| 31       | VIPA-Br                         | SO         | 80         | 72        | 96          | 0.14                                | [45]             |

<sup>a</sup> Turnover frequency (TOF): yield of cyclic carbonate (mmol)/[ionic sites (mmol)]×reaction time (h)

**Table S7.** Dosage of catalyst and catalytic performance of HPMBr0.5 and previously reported hypercrosslinked poly(ionic liquid)s *via* preparation of Friedel-Crafts alkylation.

| Entry          | Catalyst                            | Epoxide    | Dosage <sup>a</sup><br>(wt%) | Co-catalyst       | P<br>(MPa) | Temp.<br>(°C) | Time<br>(h) | Yield<br>(%) | Ref.        |
|----------------|-------------------------------------|------------|------------------------------|-------------------|------------|---------------|-------------|--------------|-------------|
| <b>1</b>       | <b>HPMBr0.5</b>                     | <b>ECH</b> | <b>3.2</b>                   | <b>None</b>       | <b>0.1</b> | <b>80</b>     | <b>24</b>   | <b>99.0</b>  | <b>This</b> |
|                |                                     |            |                              |                   | <b>1.0</b> | <b>80</b>     | <b>6</b>    | <b>99.3</b>  | <b>work</b> |
| <b>2</b>       |                                     | <b>SO</b>  | <b>2.5</b>                   | <b>None</b>       | <b>0.1</b> | <b>80</b>     | <b>36</b>   | <b>94.7</b>  | <b>This</b> |
|                |                                     |            |                              |                   | <b>1.0</b> | <b>80</b>     | <b>6</b>    | <b>97.5</b>  | <b>work</b> |
| 3 <sup>b</sup> | POM3-IM                             | ECH        | 53.8                         | None              | 1.0        | 120           | 8           | 90.0         | [16]        |
| 4 <sup>c</sup> | Polymers 3                          | ECH        | 11.4                         | ZnBr <sub>2</sub> | 1.0        | 130           | 7           | 91           | [17]        |
| 5              | HIP-Br-2                            | SO         | 5.4                          | None              | 1.0        | 120           | 6           | 99           | [20]        |
| 6              | HPILs-Cl-2                          | ECH        | 5.4                          | TBAB              | 0.1        | 70            | 9           | 99.0         | [25]        |
| 7              | IHCP-OH(1)                          | ECH        | 0.4                          | None              | 3.0        | 135           | 1           | 99.0         | [27]        |
| 8              | Py-HCP-Br                           | ECH        | 12.6                         | None              | 2.0        | 120           | 8           | 99.0         | [29]        |
| 9              | HP-[BZPhIm]Cl-<br>DCX-1             | SO         | 6.5                          | None              | 0.1        | 120           | 24          | 90.9         | [30]        |
| 10             | DHI-CSU-3-Br                        | ECH        | 10.8                         | TBAB              | 0.1        | 70            | 8           | 99.0         | [32]        |
| 11             | [HCP-CH <sub>2</sub> -Im][Cl]-<br>1 | SO         | 25                           | None              | 0.1        | 140           | 4           | 95           | [33]        |
| 12             | PIP-3                               | SO         | 4.2                          | None              | 1.0        | 100           | 24          | 98           | [34]        |
| 13             | HIP-Cl(3)-OH                        | SO         | 16.7                         | None              | 0.1        | 120           | 12          | 99           | [37]        |
| 14             | iPHCP-12                            | ECH        | 27.0                         | None              | 0.1        | 60            | 60          | 99           | [38]        |

<sup>a</sup> Dosage of catalyst. <sup>b</sup> ethanol as solvent. <sup>c</sup> DMF as solvent.

## Characterization of cyclic carbonates

### 4-methyl-1,3-dioxolan-2-one:

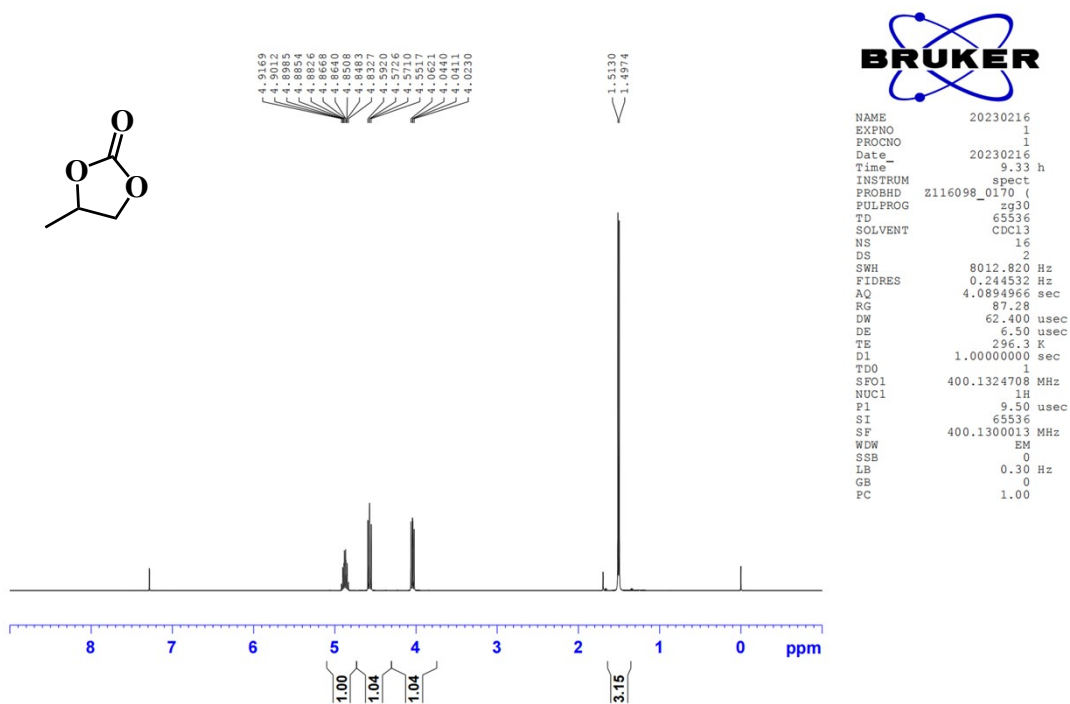

<sup>1</sup>H NMR (400 MHz, CDCl<sub>3</sub>):  $\delta$  4.91 (m, 1H), 4.58 (q, 1H), 4.05 (q, 1H), 1.50 (d, 3H).

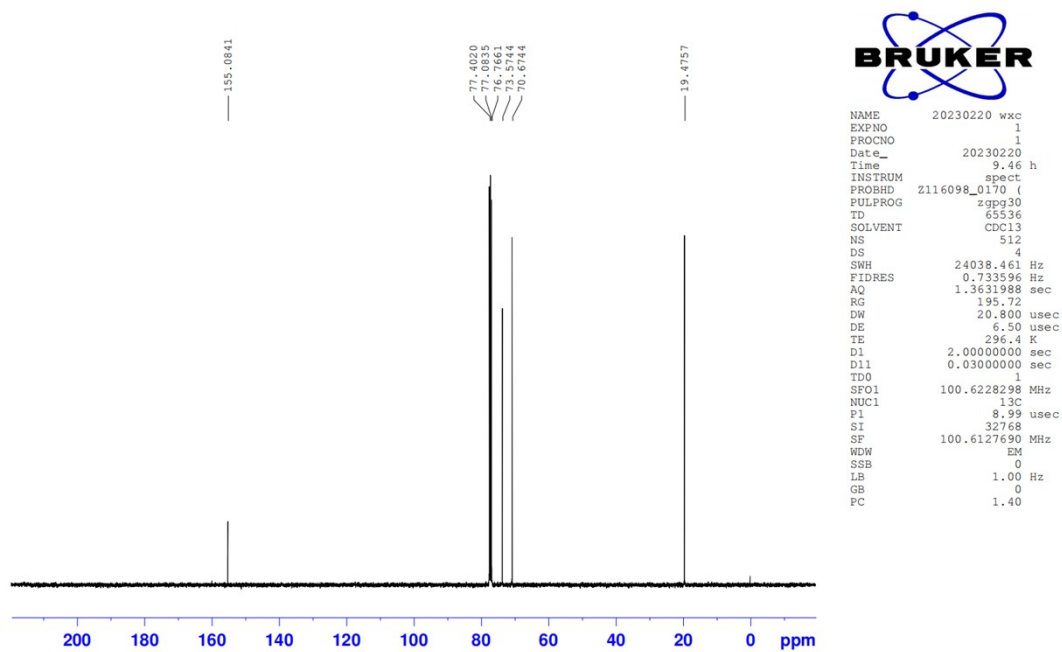

<sup>13</sup>C NMR (100 MHz, CDCl<sub>3</sub>):  $\delta$  155.1, 73.6, 70.7, 19.5.





4-(chloromethyl)-1,3-dioxolan-2-one:

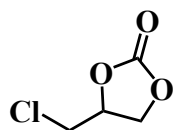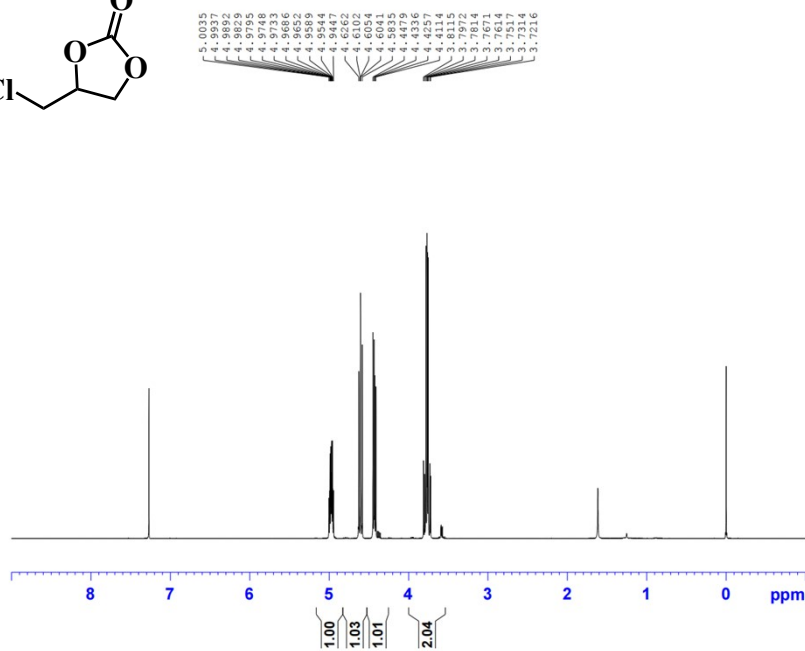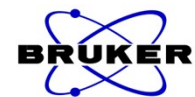

```

NAME      20230216
EXPNO     2
PROCNO    1
Date_     20230216
Time      9.39 h
INSTRUM   spect
PROBHD    Z116098_0170 (
PULPROG   zg30
TD         65536
SOLVENT   CDCl3
NS         16
DS         2
SWH       8012.820 Hz
FIDRES    0.244532 Hz
AQ         4.0894966 sec
RG         128.6
DW         62.400 usec
DE         6.50 usec
TE         296.5 K
D1         1.00000000 sec
TD0        1
SF01       400.1324708 MHz
NUC1       1H
P1         9.50 usec
SI         65536
SF         400.1300057 MHz
WDW        EM
SSB        0
LB         0.30 Hz
GB         0
PC         1.00
    
```

$^1\text{H}$  NMR (400 MHz,  $\text{CDCl}_3$ ):  $\delta$  5.00 (m, 1H), 4.63 (m, 1H), 4.45 (q, 1H), 3.81 (m, 2H).

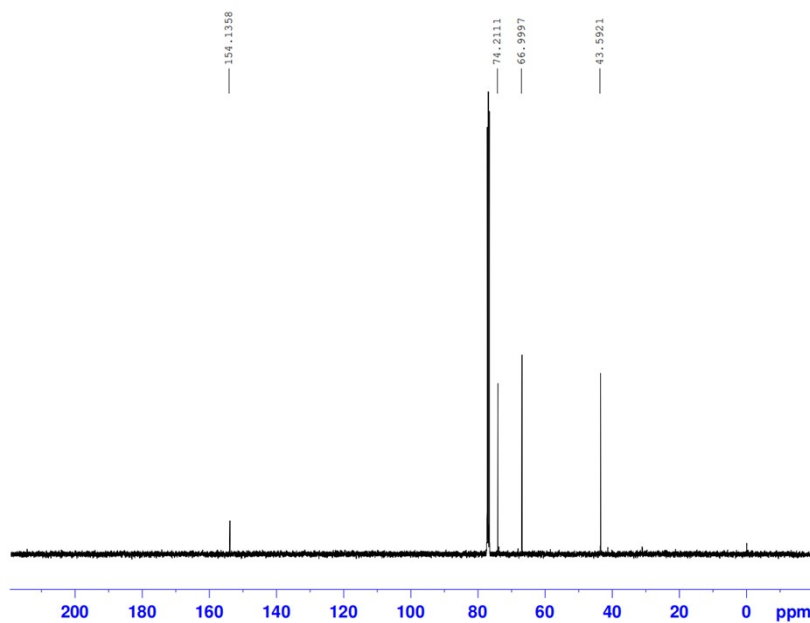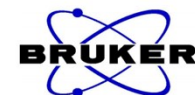

```

NAME      20230220 wxc
EXPNO     2
PROCNO    1
Date_     20230220
Time      10.19 h
INSTRUM   spect
PROBHD    Z116098_0170 (
PULPROG   zgpg30
TD         65536
SOLVENT   CDCl3
NS         512
DS         4
SWH       24038.461 Hz
FIDRES    0.733596 Hz
AQ         1.3631988 sec
RG         195.72
DW         20.800 usec
DE         6.50 usec
TE         296.5 K
D1         2.00000000 sec
D11        0.03000000 sec
TD0        1
SF01       100.6228298 MHz
NUC1       13C
P1         8.99 usec
SI         32768
SF         100.6127690 MHz
WDW        EM
SSB        0
LB         1.00 Hz
GB         0
PC         1.40
    
```

$^{13}\text{C}$  NMR (100 MHz,  $\text{CDCl}_3$ ):  $\delta$  154.1, 74.2, 67.0, 43.6.

4-phenyl-1,3-dioxolan-2-one:

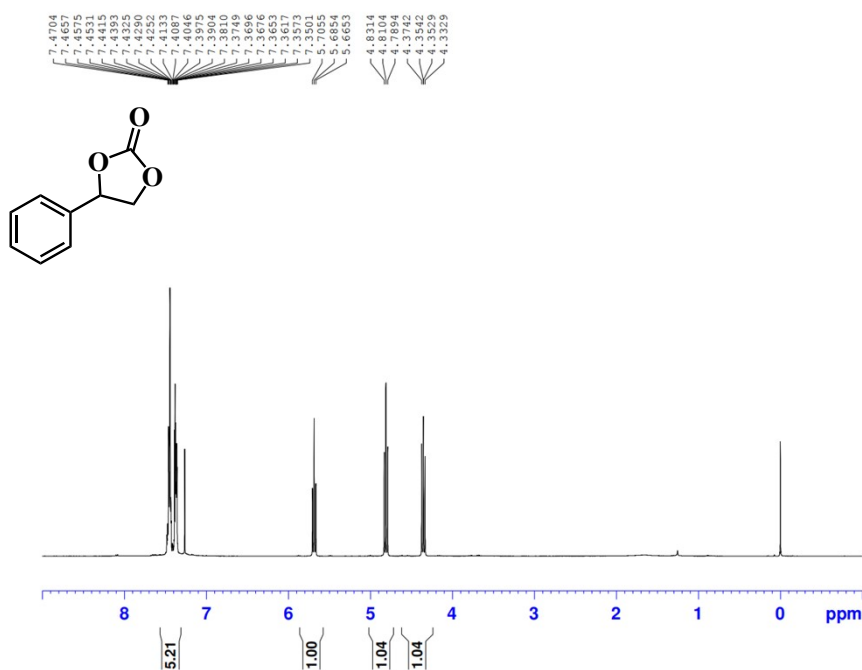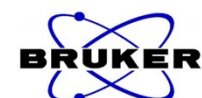

```

NAME      20230216
EXPNO    3
PROCNO   1
Date_    20230216
Time     9.45 h
INSTRUM  spect
PROBHD   z116098_0170 (
PULPROG  zg30
TD        65536
SOLVENT  CDCl3
NS        16
DS        2
SWH       8012.820 Hz
FIDRES    0.244532 Hz
AQ         4.0894966 sec
RG         111.79
DW         62.400 usec
DE         6.50 usec
TE         296.8 K
D1         1.0000000 sec
TDO       1
SF01     400.1324708 MHz
NUC1      1H
P1         9.50 usec
SI         65536
SF         400.1300084 MHz
WDW       EM
SSB       0
LB         0.30 Hz
GB         0
PC         1.00
    
```

$^1\text{H}$  NMR (400 MHz,  $\text{CDCl}_3$ ):  $\delta$  7.44 (m, 5H), 5.70 (t, 1H), 4.83 (t, 1H), 4.37 (q, 1H).

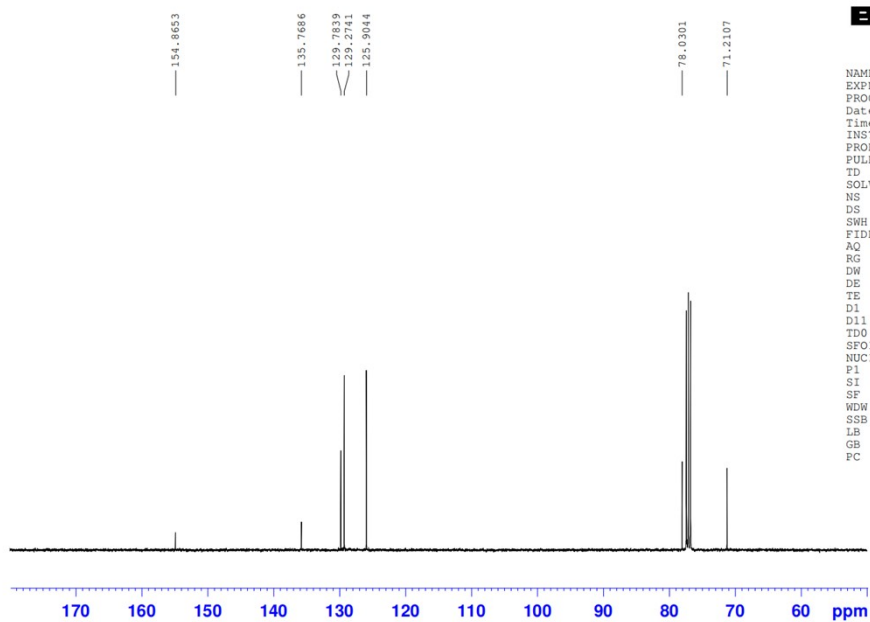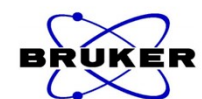

```

NAME      20230220 wxc
EXPNO    3
PROCNO   1
Date_    20230220
Time     10.53 h
INSTRUM  spect
PROBHD   z116098_0170 (
PULPROG  zgpg30
TD        65536
SOLVENT  CDCl3
NS        512
DS        4
SWH       24038.461 Hz
FIDRES    0.733596 Hz
AQ         1.3631988 sec
RG         195.72
DW         20.800 usec
DE         6.50 usec
TE         296.5 K
D1         2.0000000 sec
D11       0.0300000 sec
TDO       1
SF01     100.6228298 MHz
NUC1      13C
P1         8.99 usec
SI         32768
SF         100.6127690 MHz
WDW       EM
SSB       0
LB         1.00 Hz
GB         0
PC         1.40
    
```

$^{13}\text{C}$  NMR (100 MHz,  $\text{CDCl}_3$ ):  $\delta$  154.9, 135.8, 129.8, 129.3, 125.9, 78.0, 71.2.

allyloxymethyl-1,3-dioxolan-2-one:

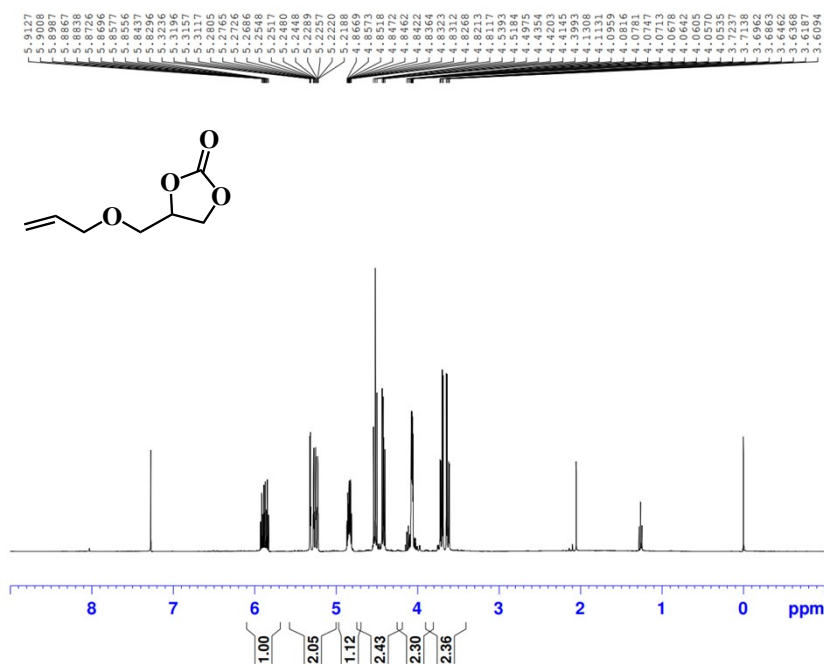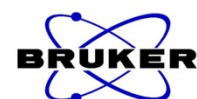

```

NAME      20230216
EXPNO     4
PROCNO    1
Date_     20230216
Time      11.53 h
INSTRUM   spect
PROBHD    Z116098_0170 (
PULPROG   zg30
TD         65536
SOLVENT   CDCl3
NS         16
DS         2
SWH        8012.820 Hz
FIDRES     0.244532 Hz
AQ         4.0894966 sec
RG         87.28
DW         62.400 usec
DE         6.50 usec
TE         295.5 K
D1         1.00000000 sec
TD0        1
SF01       400.1324708 MHz
NUC1       1H
P1         9.50 usec
SI         65536
SF         400.1300040 MHz
WDW        EM
SSB        0
LB         0.30 Hz
GB         0
PC         1.00
    
```

<sup>1</sup>H NMR (400 MHz, CDCl<sub>3</sub>): δ 5.91 (m, 1H), 5.32-5.22 (m, 2H), 4.87 (m, 1H), 4.53 (t, 1H), 4.42 (q, 1H), 4.12 (m, 2H), 3.72 (m, 2H).

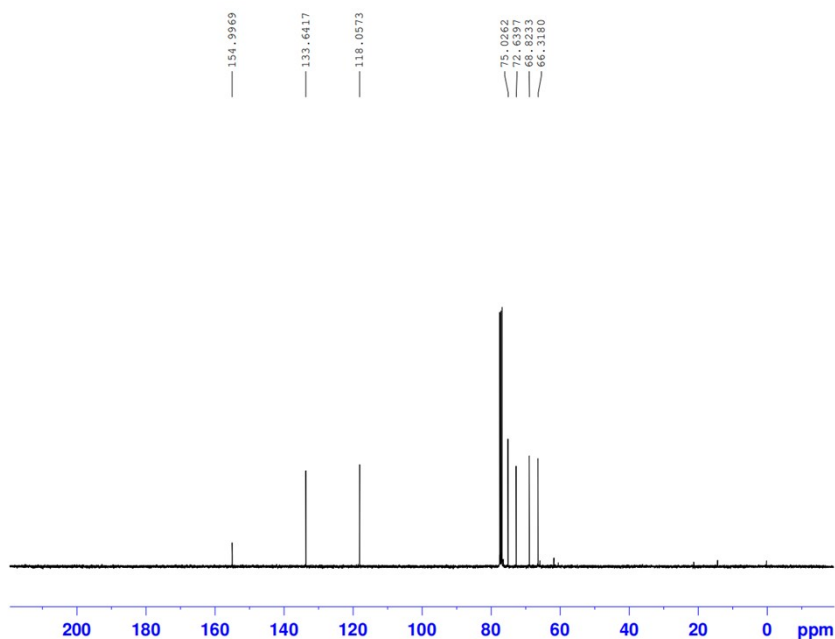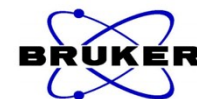

```

NAME      20230220 wxc
EXPNO     4
PROCNO    1
Date_     20230220
Time      11.26 h
INSTRUM   spect
PROBHD    Z116098_0170 (
PULPROG   zgpg30
TD         65536
SOLVENT   CDCl3
NS         512
DS         4
SWH        24038.461 Hz
FIDRES     0.733596 Hz
AQ         1.3631988 sec
RG         195.72
DW         20.800 usec
DE         6.50 usec
TE         296.6 K
D1         2.00000000 sec
D11        0.03000000 sec
TD0        1
SF01       100.6228298 MHz
NUC1       13C
P1         8.99 usec
SI         32768
SF         100.6127690 MHz
WDW        EM
SSB        0
LB         1.00 Hz
GB         0
PC         1.40
    
```

<sup>13</sup>C NMR (100 MHz, CDCl<sub>3</sub>): δ 155.0, 133.6, 118.1, 75.0, 72.6, 68.8, 66.3.

4-(phenoxyethyl)-1,3-dioxolan-2-one:

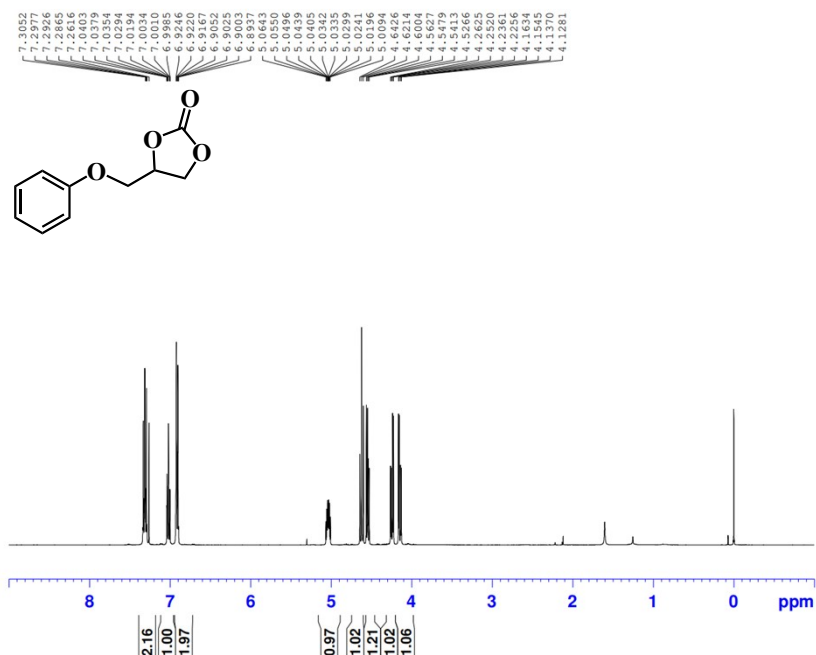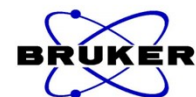

```

NAME      20230216
EXPNO     5
PROCNO    1
Date_     20230216
Time      14.38 h
INSTRUM   spect
PROBHD    Z116098_0170 (
PULPROG   zg30
TD         65536
SOLVENT   CDC13
NS         16
DS         2
SWH        8012.820 Hz
FIDRES     0.244532 Hz
AQ         4.0894966 sec
RG         111.79
DW         62.400 usec
DE         6.50 usec
TE         294.3 K
D1         1.00000000 sec
TDO        1
SFO1       400.1324708 MHz
NUC1       1H
P1         9.50 usec
SI         65536
SF         400.1300092 MHz
WDW        EM
SSB        0
LB         0.30 Hz
GB         0
PC         1.00
    
```

$^1\text{H}$  NMR (400 MHz,  $\text{CDCl}_3$ ):  $\delta$  7.31 (m, 2H), 7.03 (t, 1H), 6.92 (t, 2H), 5.05 (m, 1H), 4.63 (t, 1H), 4.54 (q, 1H), 4.25 (q, 1H), 4.16 (q, 1H).

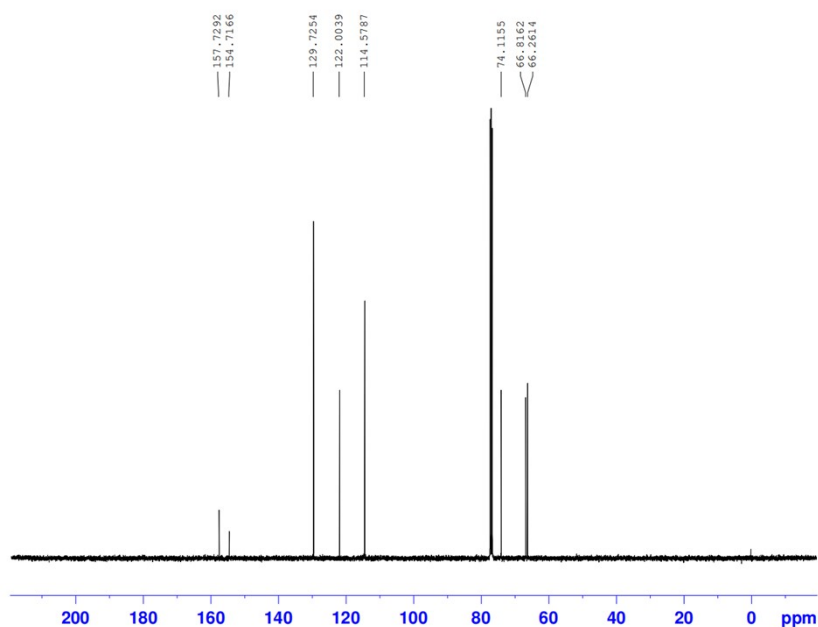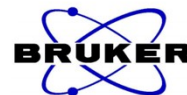

```

NAME      20230220 wxc
EXPNO     5
PROCNO    1
Date_     20230220
Time      11.59 h
INSTRUM   spect
PROBHD    Z116098_0170 (
PULPROG   zgpg30
TD         65536
SOLVENT   CDC13
NS         512
DS         4
SWH        24038.461 Hz
FIDRES     0.733596 Hz
AQ         1.3631988 sec
RG         195.72
DW         20.800 usec
DE         6.50 usec
TE         296.5 K
D1         2.00000000 sec
D11        0.03000000 sec
TDO        1
SFO1       100.6228298 MHz
NUC1       13C
P1         8.99 usec
SI         32768
SF         100.6127690 MHz
WDW        EM
SSB        0
LB         1.00 Hz
GB         0
PC         1.40
    
```

$^{13}\text{C}$  NMR (100 MHz,  $\text{CDCl}_3$ ):  $\delta$  157.8, 154.7, 129.7, 122.0, 114.6, 74.1, 66.9, 66.2.

4-butyl-1,3-dioxolan-2-one:

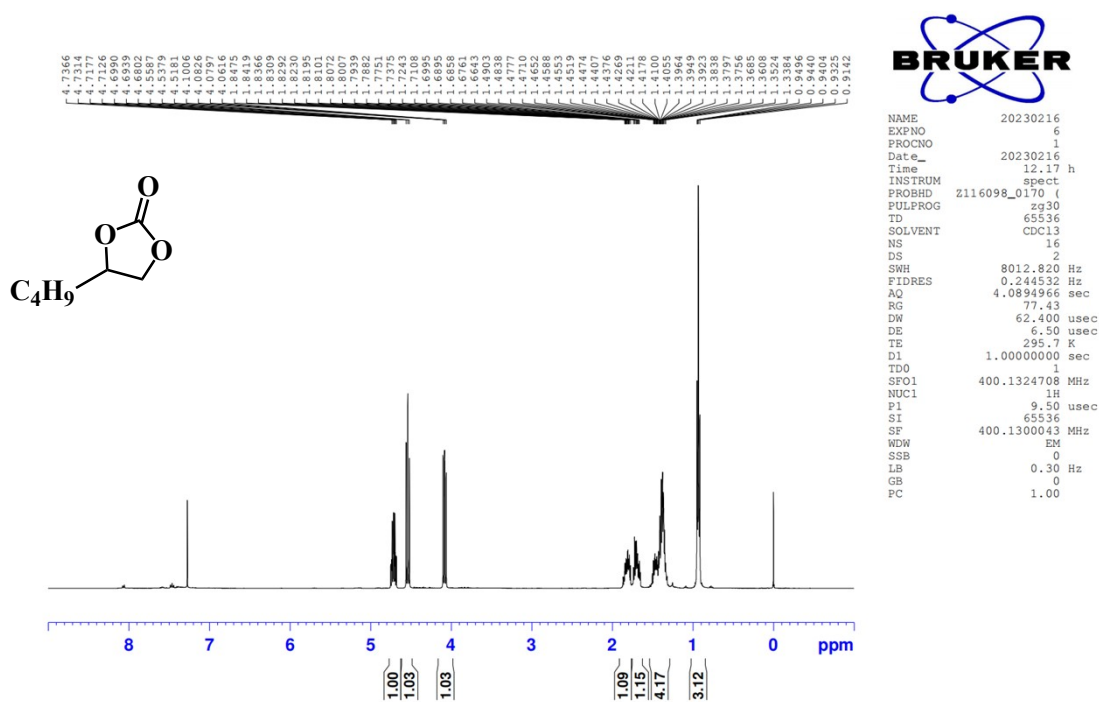

$^1\text{H}$  NMR (400 MHz,  $\text{CDCl}_3$ ):  $\delta$  4.74 (m, 1H), 4.55 (t, 1H), 4.09 (q, 1H), 1.84 (m, 2H), 1.49 (m, 4H), 0.95 (t, 3H).

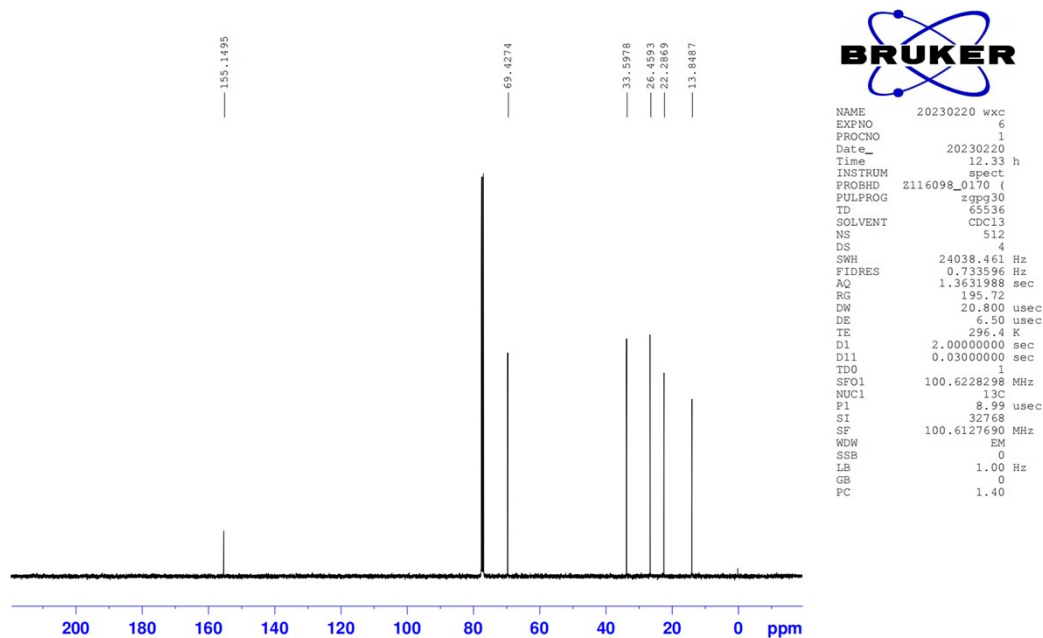

$^{13}\text{C}$  NMR (100 MHz,  $\text{CDCl}_3$ ):  $\delta$  155.1, 77.1, 69.4, 33.5, 26.4, 22.2, 13.8.

**4-octyl-1,3-dioxolan-2-one:**

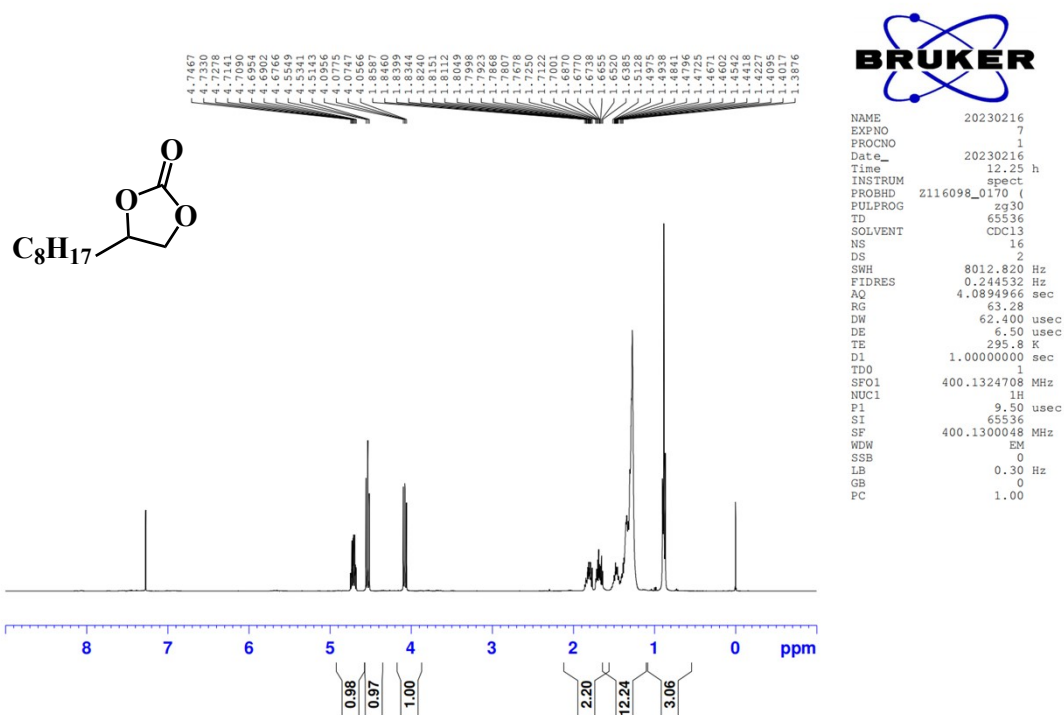

<sup>1</sup>H NMR (400 MHz, CDCl<sub>3</sub>): δ 4.75 (m, 1H), 4.53 (t, 1H), 4.09 (q, 1H), 1.86 (m, 2H), 1.51 (m, 12H), 0.90 (t, 3H).

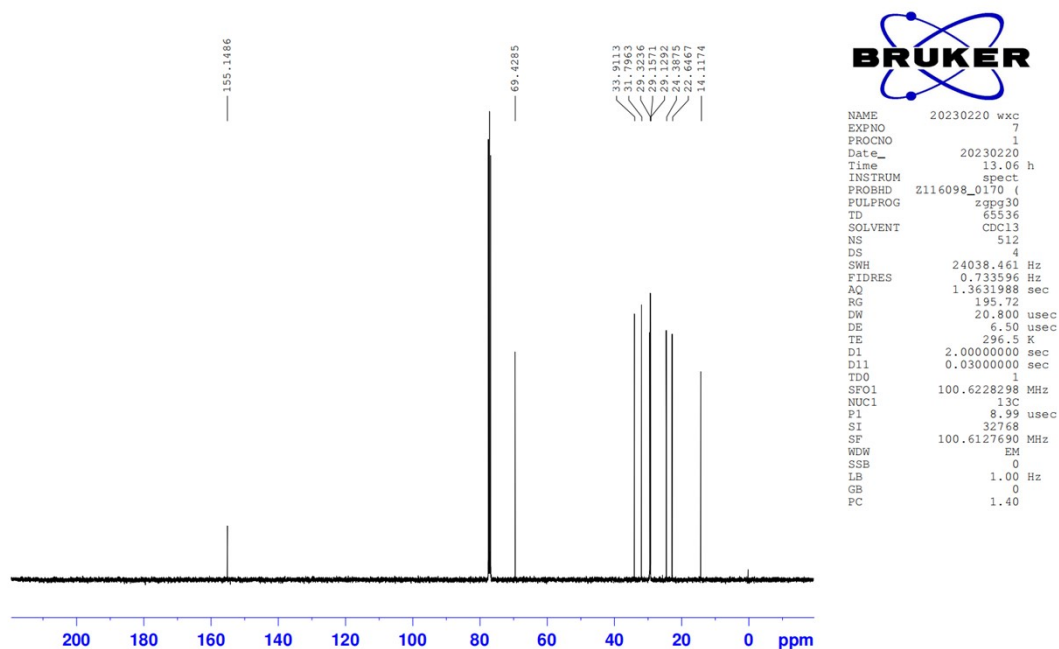

<sup>13</sup>C NMR (100 MHz, CDCl<sub>3</sub>): δ 155.1, 77.1, 69.4, 33.9, 31.8, 29.3, 29.1, 29.1, 24.4, 22.6, 14.1.

4-decyl-1,3-dioxolan-2-one:

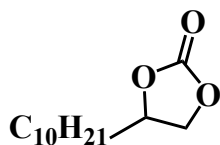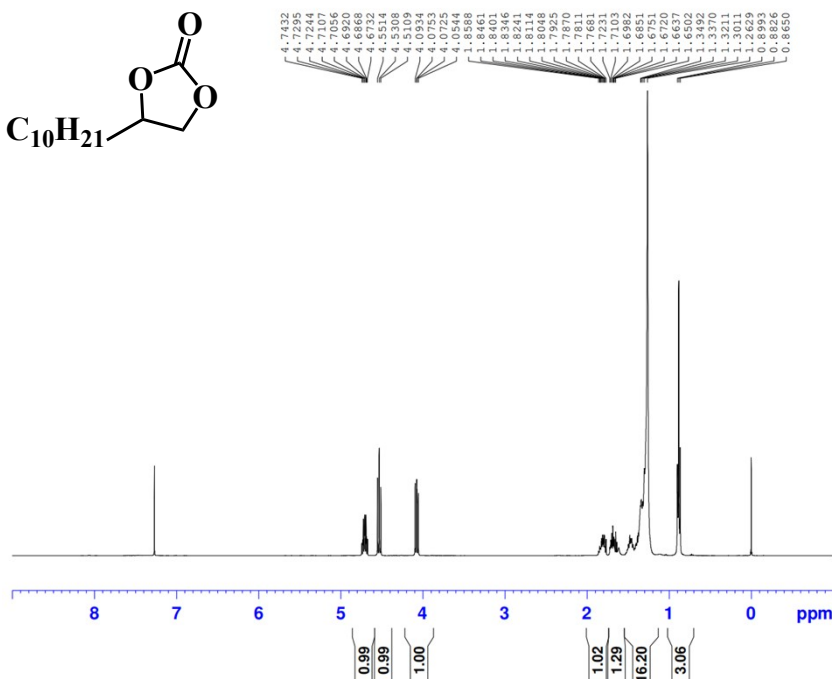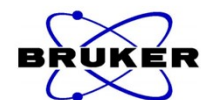

```

NAME      20230216
EXPNO    8
PROCNO   1
Date_    20230216
Time     14.43 h
INSTRUM  spect
PROBHD   Z116098_0170 (
PULPROG  zg30
TD       65536
SOLVENT  CDCl3
NS       16
DS       2
SWH      8012.820 Hz
FIDRES   0.244532 Hz
AQ       4.0894966 sec
RG       77.43
DW       62.400 usec
DE       6.50 usec
TE       294.2 K
D1       1.00000000 sec
TDO      1
SFO1     400.1324708 MHz
NUC1     1H
P1       9.50 usec
SI       65536
SF       400.1300064 MHz
WDW      EM
SSB      0
LB       0.30 Hz
GB       0
PC       1.00
    
```

$^1\text{H}$  NMR (400 MHz,  $\text{CDCl}_3$ ):  $\delta$  4.74 (m, 1H), 4.54 (t, 1H), 4.09 (t, 1H), 1.86 (m, 2H), 1.51 (m, 16H), 0.90 (t, 3H).

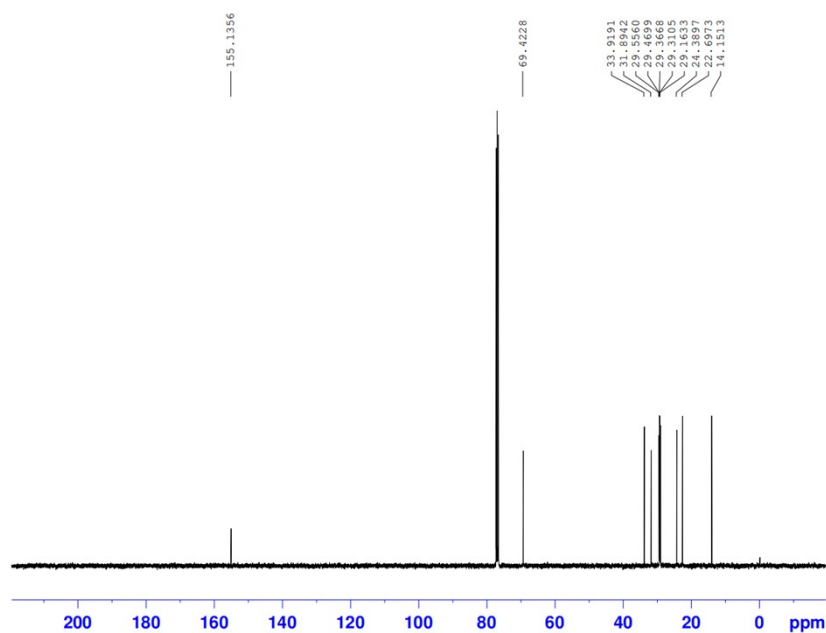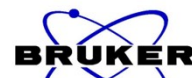

```

NAME      20230220 wxc
EXPNO    8
PROCNO   1
Date_    20230220
Time     13.40 h
INSTRUM  spect
PROBHD   Z116098_0170 (
PULPROG  zgpg30
TD       65536
SOLVENT  CDCl3
NS       512
DS       4
SWH      24038.461 Hz
FIDRES   0.733596 Hz
AQ       1.3631988 sec
RG       195.72
DW       20.800 usec
DE       6.50 usec
TE       296.6 K
D1       2.00000000 sec
D11      0.03000000 sec
TDO      1
SFO1     100.6228298 MHz
NUC1     13C
P1       8.99 usec
SI       32768
SF       100.6127690 MHz
WDW      EM
SSB      0
LB       1.00 Hz
GB       0
PC       1.40
    
```

$^{13}\text{C}$  NMR (100 MHz,  $\text{CDCl}_3$ ):  $\delta$  155.1, 77.0, 69.4, 33.9, 31.9, 29.5, 29.4, 29.3, 29.2, 29.1, 24.4, 22.7, 14.1.



4-dodecyl-1,3-dioxolan-2-one:

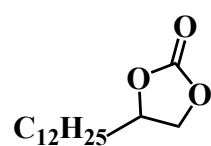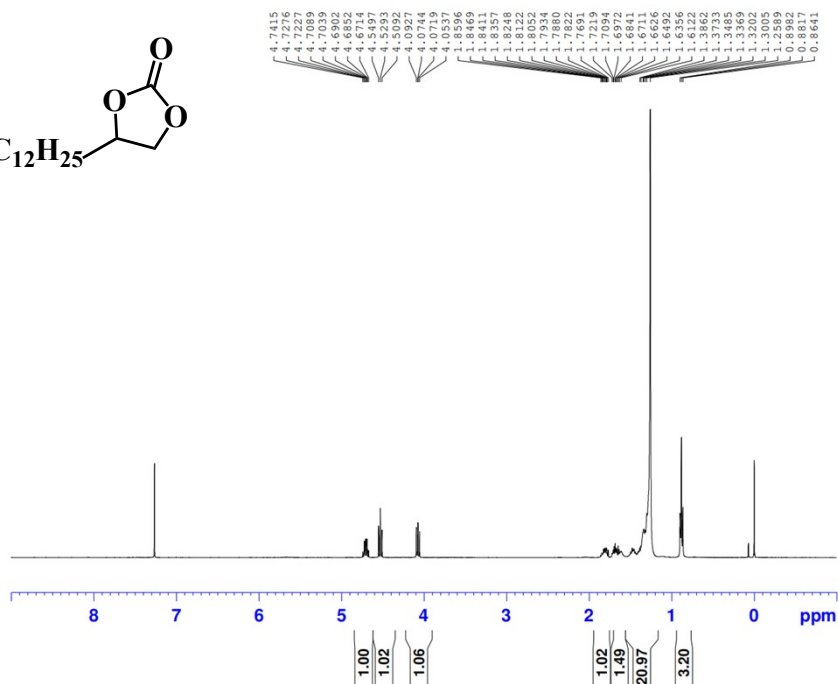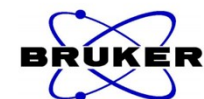

```

NAME      20230216
EXPNO     9
PROCNO    1
Date_     20230216
Time      14.49 h
INSTRUM   spect
PROBHD    Z116098_0170 (
PULPROG   zg30
TD        65536
SOLVENT   CDCl3
NS        16
DS        2
SWH       8012.820 Hz
FIDRES    0.244532 Hz
AQ        4.0894966 sec
RG        111.79
DW        62.400 usec
DE        6.50 usec
TE        294.3 K
D1        1.0000000 sec
TDO       1
SFO1      400.1324708 MHz
NUC1      1H
P1        9.50 usec
SI        65536
SF        400.1300077 MHz
WDW       EM
SSB       0
LB        0.30 Hz
GB        0
PC        1.00
    
```

<sup>1</sup>H NMR (400 MHz, CDCl<sub>3</sub>): δ 4.74 (m, 1H), 4.54 (t, 1H), 4.09 (q, 1H), 1.85 (m, 2H), 1.51 (m, 20H), 0.90 (t, 3H).

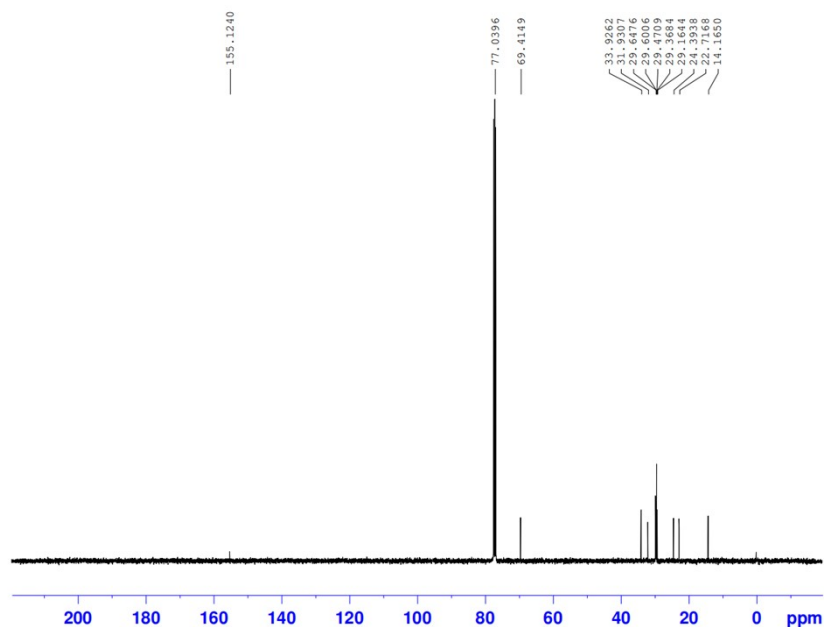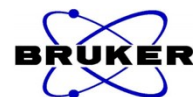

```

NAME      20230220 wxc
EXPNO     9
PROCNO    1
Date_     20230220
Time      14.14 h
INSTRUM   spect
PROBHD    Z116098_0170 (
PULPROG   zgpg30
TD        65536
SOLVENT   CDCl3
NS        512
DS        4
SWH       24038.461 Hz
FIDRES    0.733596 Hz
AQ        1.3631988 sec
RG        195.72
DW        20.800 usec
DE        6.50 usec
TE        295.7 K
D1        2.0000000 sec
D11       0.0300000 sec
TDO       1
SFO1      100.6228298 MHz
NUC1      13C
P1        8.99 usec
SI        32768
SF        100.6127690 MHz
WDW       EM
SSB       0
LB        1.00 Hz
GB        0
PC        1.40
    
```

<sup>13</sup>C NMR (100 MHz, CDCl<sub>3</sub>): δ 155.1, 77.0, 69.4, 33.9, 31.9, 29.6, 29.6, 29.4, 29.3, 29.1, 24.4, 22.7, 14.1.



## Supplementary References

1. S. Ghazali-Esfahani, H. Song, E. Păunescu, F. D. Bobbink, H. Liu, Z. Fei, G. Laurency, M. Bagherzadeh, N. Yan and P. J. Dyson, *Green Chem.*, 2013, **15**, 1584-1589.
2. X. Wang, Y. Zhou, Z. Guo, G. Chen, J. Li, Y. Shi, Y. Liu and J. Wang, *Chem Sci.*, 2015, **6**, 6916-6924.
3. I. Azcune, I. Garcia, P. M. Carrasco, A. Genua, M. Tanczyk, M. Jaschik, K. Warmuzinski, G. Cabanero and I. Odriozola, *ChemSusChem*, 2014, **7**, 3407-3412.
4. W. Zhong, F. D. Bobbink, Z. Fei and P. J. Dyson, *ChemSusChem*, 2017, **10**, 2728-2735.
5. Q. Sun, S. Ma, Z. Dai, X. Meng and F.-S. Xiao, *J. Mater. Chem. A*, 2015, **3**, 23871-23875.
6. Y. Xie, Q. Sun, Y. Fu, L. Song, J. Liang, X. Xu, H. Wang, J. Li, S. Tu, X. Lu and J. Li, *J. Mater. Chem. A*, 2017, **5**, 25594-25600.
7. Y. Xie, J. Liang, Y. Fu, M. Huang, X. Xu, H. Wang, S. Tu and J. Li, *J. Mater. Chem. A*, 2018, **6**, 6660-6666.
8. Z. Guo, X. Cai, J. Xie, X. Wang, Y. Zhou and J. Wang, *ACS Appl. Mater. Interfaces*, 2016, **8**, 12812-12821.
9. Y. Zhou, W. Zhang, L. Ma, Y. Zhou and J. Wang, *ACS Sustainable Chem. Eng.*, 2019, **7**, 9387-9398.
10. H. Song, Y. Wang, M. Xiao, L. Liu, Y. Liu, X. Liu and H. Gai, *ACS Sustainable Chem. Eng.*, 2019, **7**, 9489-9497.
11. L. Qin, B. Wang, Y. Zhang, L. Chen and G. Gao, *Chem. Comm.*, 2017, **53**, 3785-3788.
12. Z. Guo, Q. Jiang, Y. Shi, J. Li, X. Yang, W. Hou, Y. Zhou and J. Wang, *ACS Catal.*, 2017, **7**, 6770-6780.
13. Y. He, D. Jiang, X. Li, J. Ding, H. Li, H. Wan and G. Guan, *J. CO<sub>2</sub> Util.*, 2021, **44**, 101427.
14. Q. Yi, T. Liu, X. Wang, Y. Shan, X. Li, M. Ding, L. Shi, H. Zeng and Y. Wu, *Appl. Catal., B*, 2021, **283**, 119602.
15. W. Hui, X.-M. He, X.-Y. Xu, Y.-M. Chen, Y. Zhou, Z.-M. Li, L. Zhang and D.-J. Tao, *J. CO<sub>2</sub> Util.*, 2020, **36**, 169-176.
16. J. Wang, W. Sng, G. Yi and Y. Zhang, *Chem Comm.*, 2015, **51**, 12076-12079.
17. J. Wang, J. G. Wei Yang, G. Yi and Y. Zhang, *Chem Comm.*, 2015, **51**, 15708-15711.
18. S. Xu, K. Song, T. Li and B. Tan, *J. Mater. Chem. A*, 2015, **3**, 1272-1278.
19. L. Hu, H. Ni, X. Chen, L. Wang, Y. Wei, T. Jiang, Y. Lü, X. Lu and P. Ye, *Polym. Eng. Sci.*, 2016, **56**, 573-582.
20. J. Li, D. Jia, Z. Guo, Y. Liu, Y. Lyu, Y. Zhou and J. Wang, *Green Chem.*, 2017, **19**, 2675-2686.
21. S. Hao, Y. Liu, C. Shang, Z. Liang and J. Yu, *Polym. Chem.*, 2017, **8**, 1833-1839.
22. P. Puthiaraj, S. Ravi, K. Yu and W.-S. Ahn, *Appl. Catal. B*, 2019, **251**, 195-205.
23. W. Zhang, F. Ma, L. Ma, Y. Zhou and J. Wang, *ChemSusChem*, 2020, **13**, 341-350.
24. X. Li, G. Chen and Q. Jia, *Microporous Mesoporous Mater.*, 2019, **279**, 186-192.
25. Y. Sang and J. Huang, *Chem. Eng. J.*, 2020, **385**, 123973.
26. J. Li, Y. Han, H. Lin, N. Wu, Q. Li, J. Jiang and J. Zhu, *ACS Appl. Mater. Interfaces*, 2020, **12**, 609-618.
27. D. Jia, L. Ma, Y. Wang, W. Zhang, J. Li, Y. Zhou and J. Wang, *Chem. Eng. J.*, 2020, **390**, 124652.
28. H. Zhou, Q. Chen, X. Tong and H. Liu, *Colloids Interface Sci. Commun.*, 2020, **37**, 100285.
29. C. Liu, L. Shi, J. Zhang and J. Sun, *Chem. Eng. J.*, 2022, **427**, 131633.
30. H. Song, Y. Wang, Y. Liu, L. Chen, B. Feng, X. Jin, Y. Zhou, T. Huang, M. Xiao, F. Huang and H.

- Gai, *ACS Sustainable Chem. Eng.*, 2021, **9**, 2115-2128.
31. Q. Ren, Y. Chen, Y. Qiu, L. Tao and H. Ji, *Cata. Lett.*, 2021, **151**, 2919-2927.
  32. Y. Sang, Z. Shu, Y. Wang, L. Wang, D. Zhang, Q. Xiao, F. Zhou and J. Huang, *Appl. Surf. Sci.*, 2022, **585**, 152663.
  33. X. Liao, B. Pei, R. Ma, L. Kong, X. Gao, J. He, X. Luo and J. Lin, *Catalysts*, 2022, **12**, 62.
  34. K. Cai, P. Liu, T. Zhao, K. Su, Y. Yang and D.-J. Tao, *Microporous and Mesoporous Mater.*, 2022, **343**, 112135.
  35. K. Wang, W. Cui, Z. Bian, Y. Liu, S. Jiang, Y. Zhou and J. Wang, *Appl. Catal., B*, 2021, **281**, 119425.
  36. X. Suo, Y. Huang, Z. Li, H. Pan, X. Cui and H. Xing, *Sci. China Mater.*, 2021, **65**, 1068-1075.
  37. X. Liao, X. Xiang, Z. Wang, R. Ma, L. Kong, X. Gao, J. He, W. Hou, C. Peng and J. Lin, *Sustainable Energy Fuels*, 2022, **6**, 2846-2857.
  38. Y. Zhang, K. Liu, L. Wu, H. Huang, Z. Xu, Z. Long, M. Tong, Y. Gu, Z. Qin and G. Chen, *Dalton Trans.*, 2021, **50**, 11878-11888.
  39. J. Gu, P. Shao, L. Luo, Y. Wang, T. Zhao, C. Yang, P. Chen and F. Liu, *Sep. Purif. Technol.*, 2022, **285**, 120377.
  40. J. Cao, W. Shan, Q. Wang, X. Ling, G. Li, Y. Lyu, Y. Zhou and J. Wang, *ACS Appl. Mater. Interfaces*, 2019, **11**, 6031-6041.
  41. S. Subramanian, J. Oppenheim, D. Kim, T. S. Nguyen, W. M. H. Silo, B. Kim, W. A. Goddard and C. T. Yavuz, *Chem*, 2019, **5**, 3232-3242.
  42. L.-G. Ding, B.-J. Yao, F. Li, S.-C. Shi, N. Huang, H.-B. Yin, Q. Guan and Y.-B. Dong, *J. Mater. Chem. A*, 2019, **7**, 4689-4698.
  43. J. Zhang, X. Li, Z. Zhu, T. Chang, X. Fu, Y. Hao, X. Meng, B. Panchal and S. Qin, *Adv. Sustain. Syst.*, 2020, **5**, 2000133.
  44. G. Chen, Y. Zhang, J. Xu, X. Liu, K. Liu, M. Tong and Z. Long, *Chem. Eng. J.*, 2020, **381**, 122765.
  45. Z. Xu, K. Liu, H. Huang, Y. Zhang, Z. Long, M. Tong and G. Chen, *J. Mater. Chem. A*, 2022, **10**, 5540-5549.
